# Supplementary material for: Assessing the characteristics and drivers of compound flooding events around the UK coast
Source: Copernicus journal article supplement (doi:10.5194/hess-23-3117-2019), 2019-07-23
Supplement: Supplementary file [file hess-23-3117-2019-supplement.pdf]

Supplement of Hydrol. Earth Syst. Sci., 23, 3117–3139, 2019  
<https://doi.org/10.5194/hess-23-3117-2019-supplement>  
© Author(s) 2019. This work is distributed under  
the Creative Commons Attribution 4.0 License.

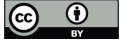

*Supplement of*

## **Assessing the characteristics and drivers of compound flooding events around the UK coast**

**Alistair Hendry et al.**

*Correspondence to:* Alistair Hendry (a.hendry@soton.ac.uk)

The copyright of individual parts of the supplement might differ from the CC BY 4.0 License.

## Supplementary Figures

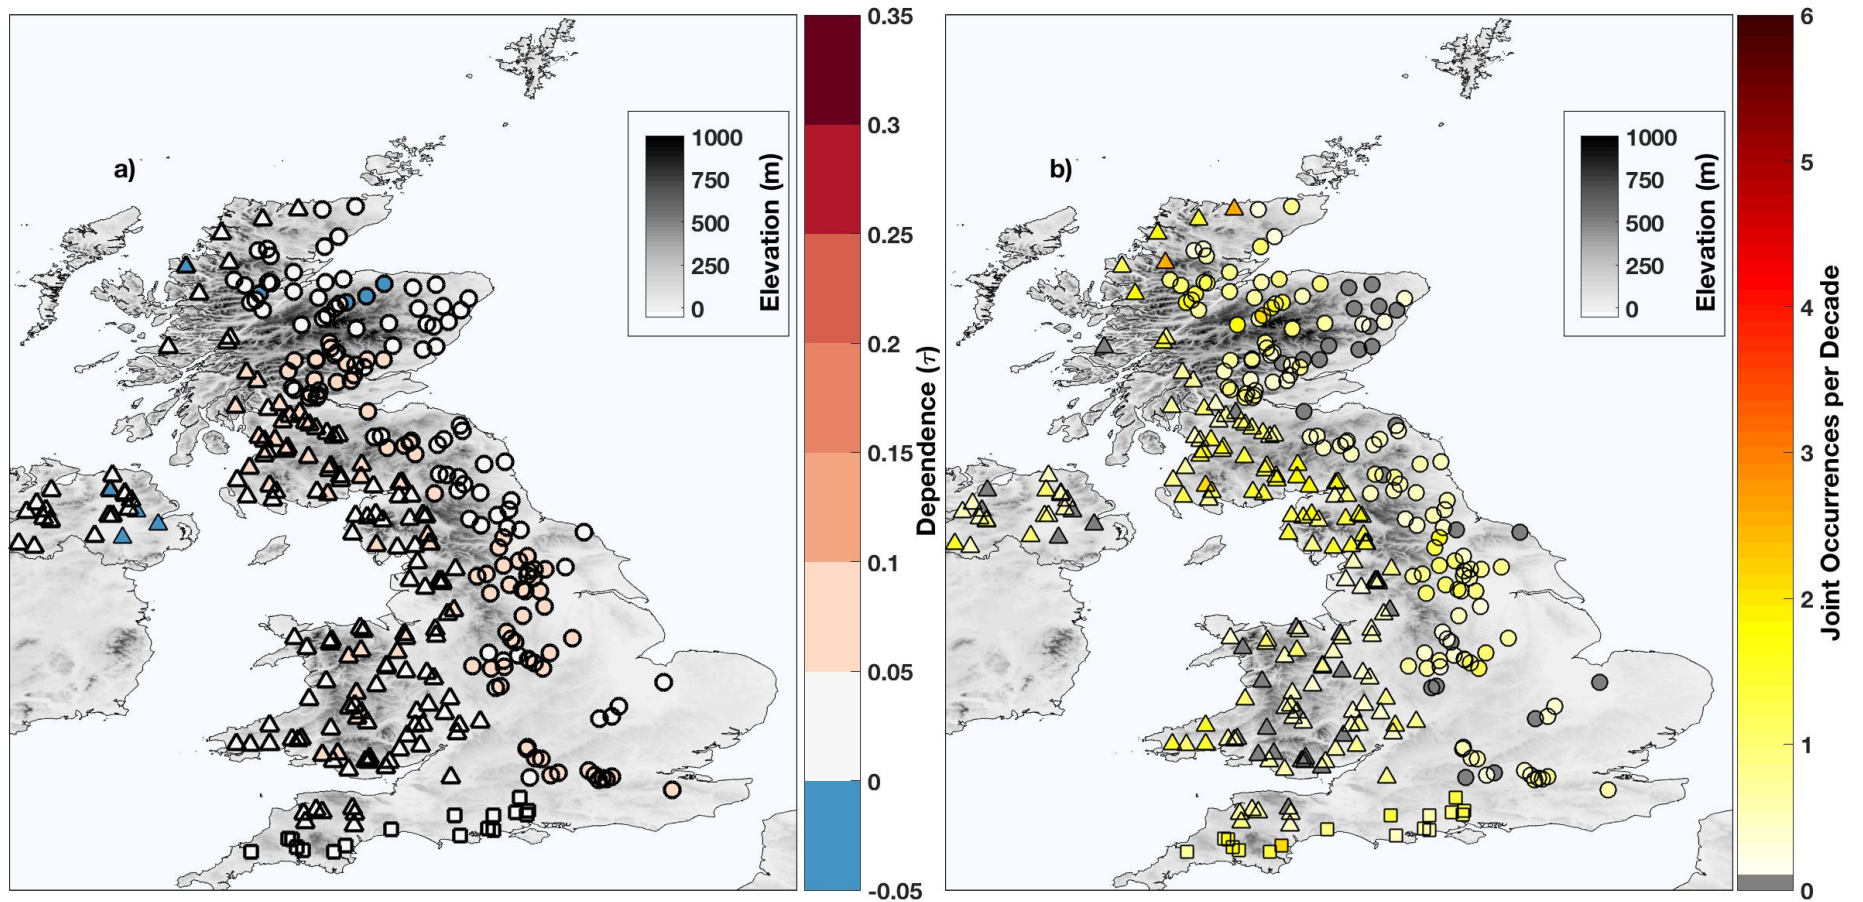

**Figure S1:** (a) Kendall's Rank Correlation  $\tau$  between daily maximum skew surge and daily maximum river discharge; and (b) number of joint occurrences per decade between extreme skew surge and extreme river discharge, at -5-day lag. Thick black lines in (a) represent that the dependence is statistically significant (95% confidence) at these sites.

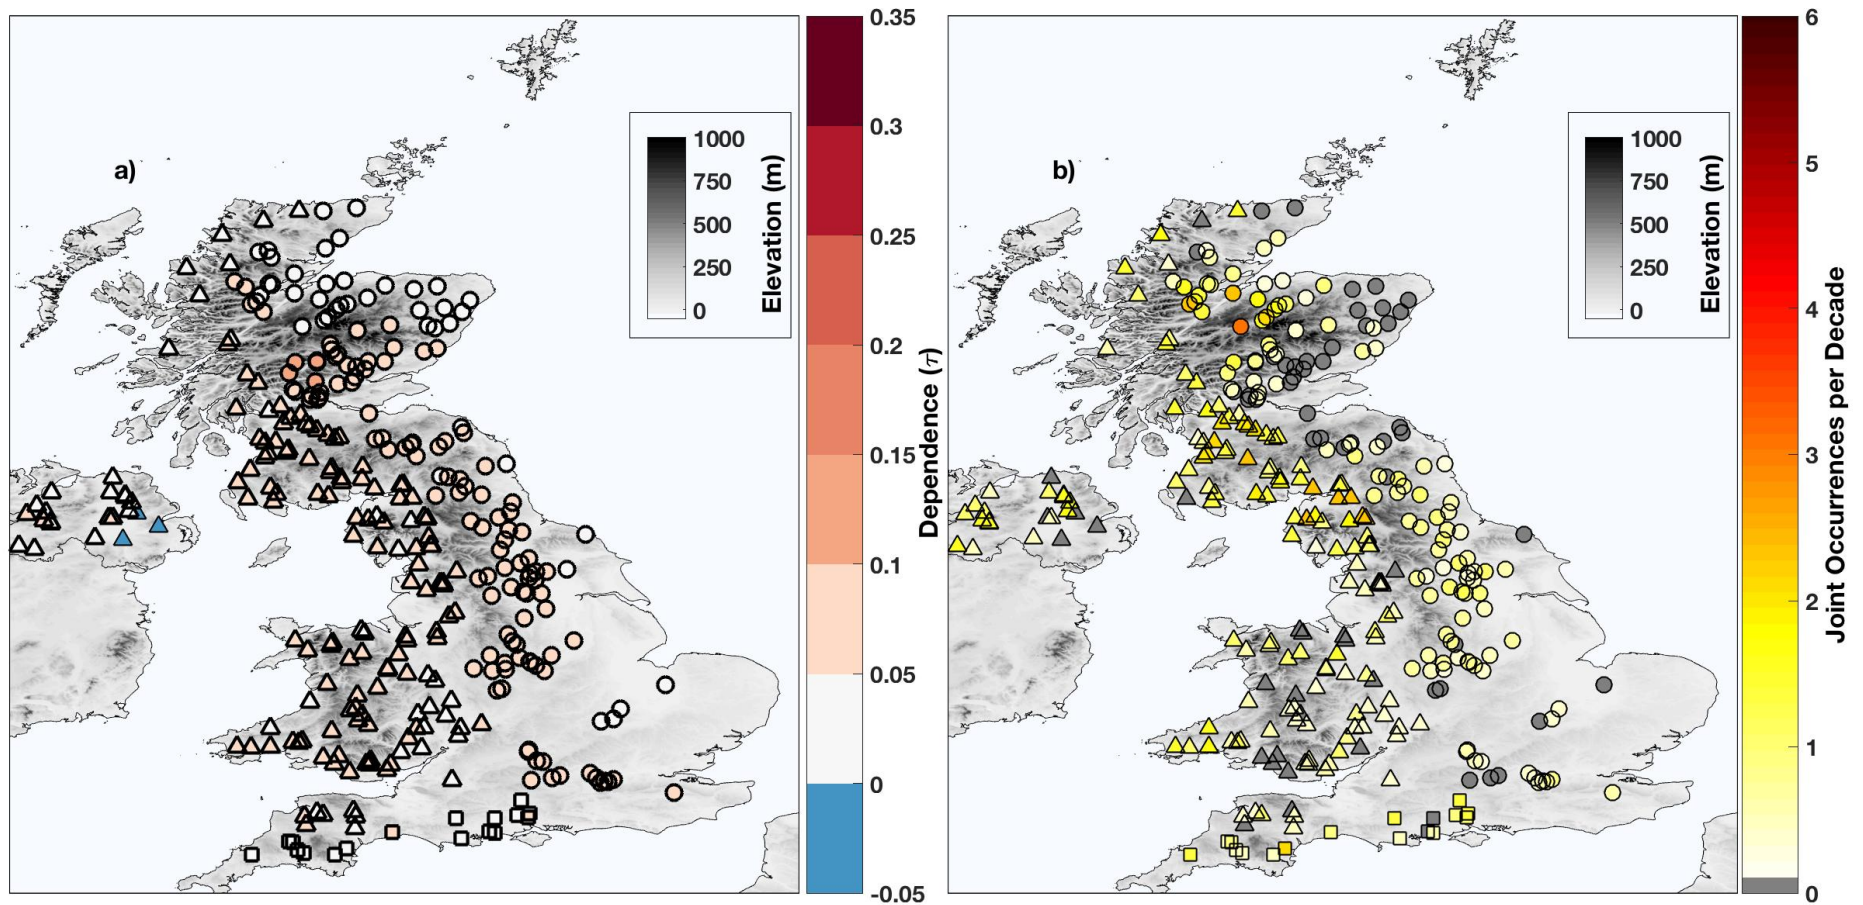

**Figure S2:** (a) Kendall's Rank Correlation  $\tau$  between daily maximum skew surge and daily maximum river discharge; and (b) number of joint occurrences per decade between extreme skew surge and extreme river discharge, at -4-day lag. Thick black lines in (a) represent that the dependence is statistically significant (95% confidence) at these sites.



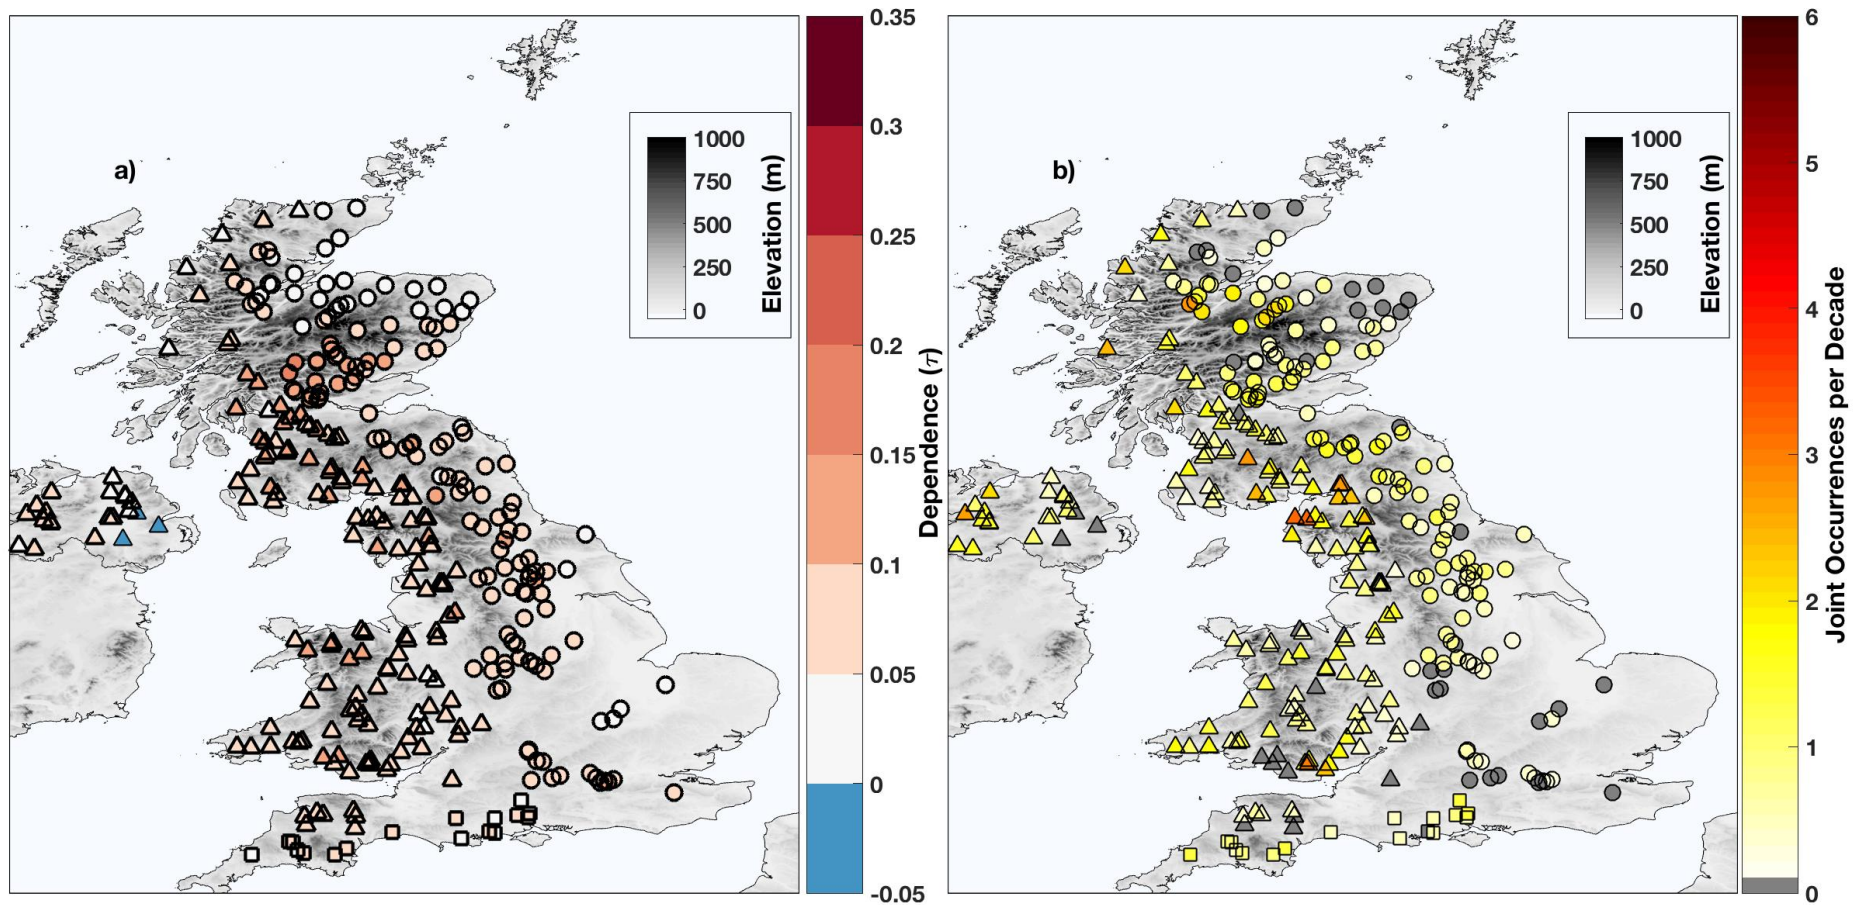

**Figure S3:** (a) Kendall's Rank Correlation  $\tau$  between daily maximum skew surge and daily maximum river discharge; and (b) number of joint occurrences per decade between extreme skew surge and extreme river discharge, at -3-day lag. Thick black lines in (a) represent that the dependence is statistically significant (95% confidence) at these sites.



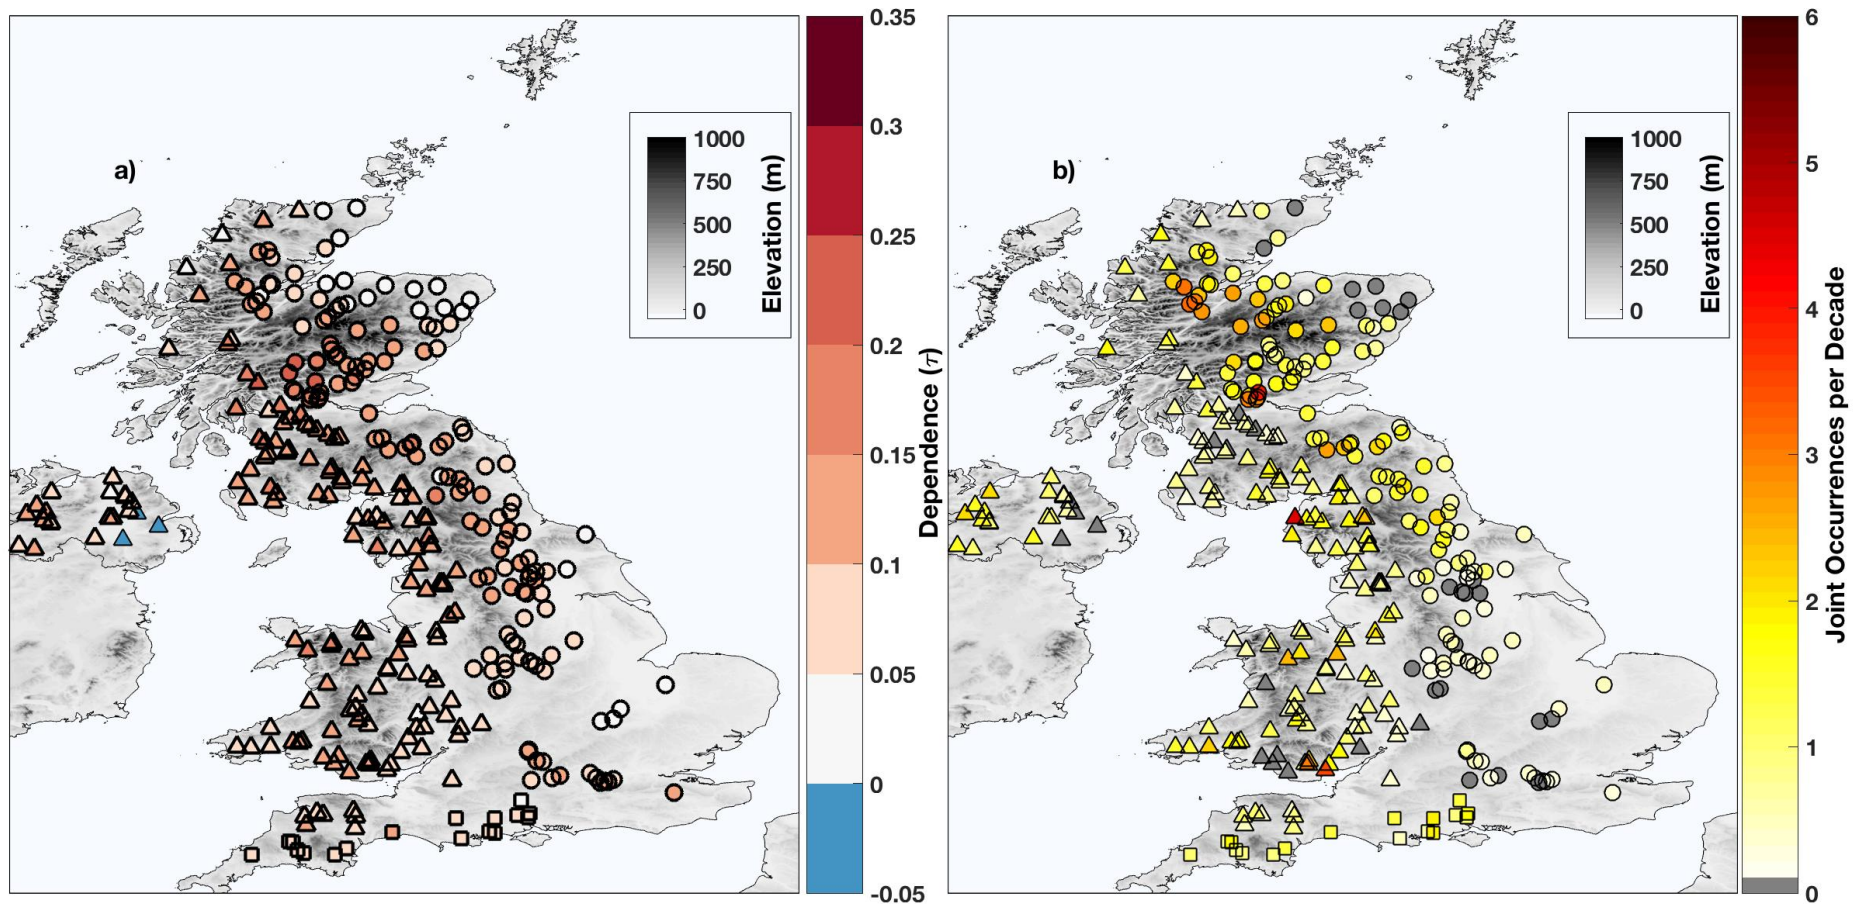

**Figure S4:** (a) Kendall's Rank Correlation  $\tau$  between daily maximum skew surge and daily maximum river discharge; and (b) number of joint occurrences per decade between extreme skew surge and extreme river discharge, at -2-day lag. Thick black lines in (a) represent that the dependence is statistically significant (95% confidence) at these sites.

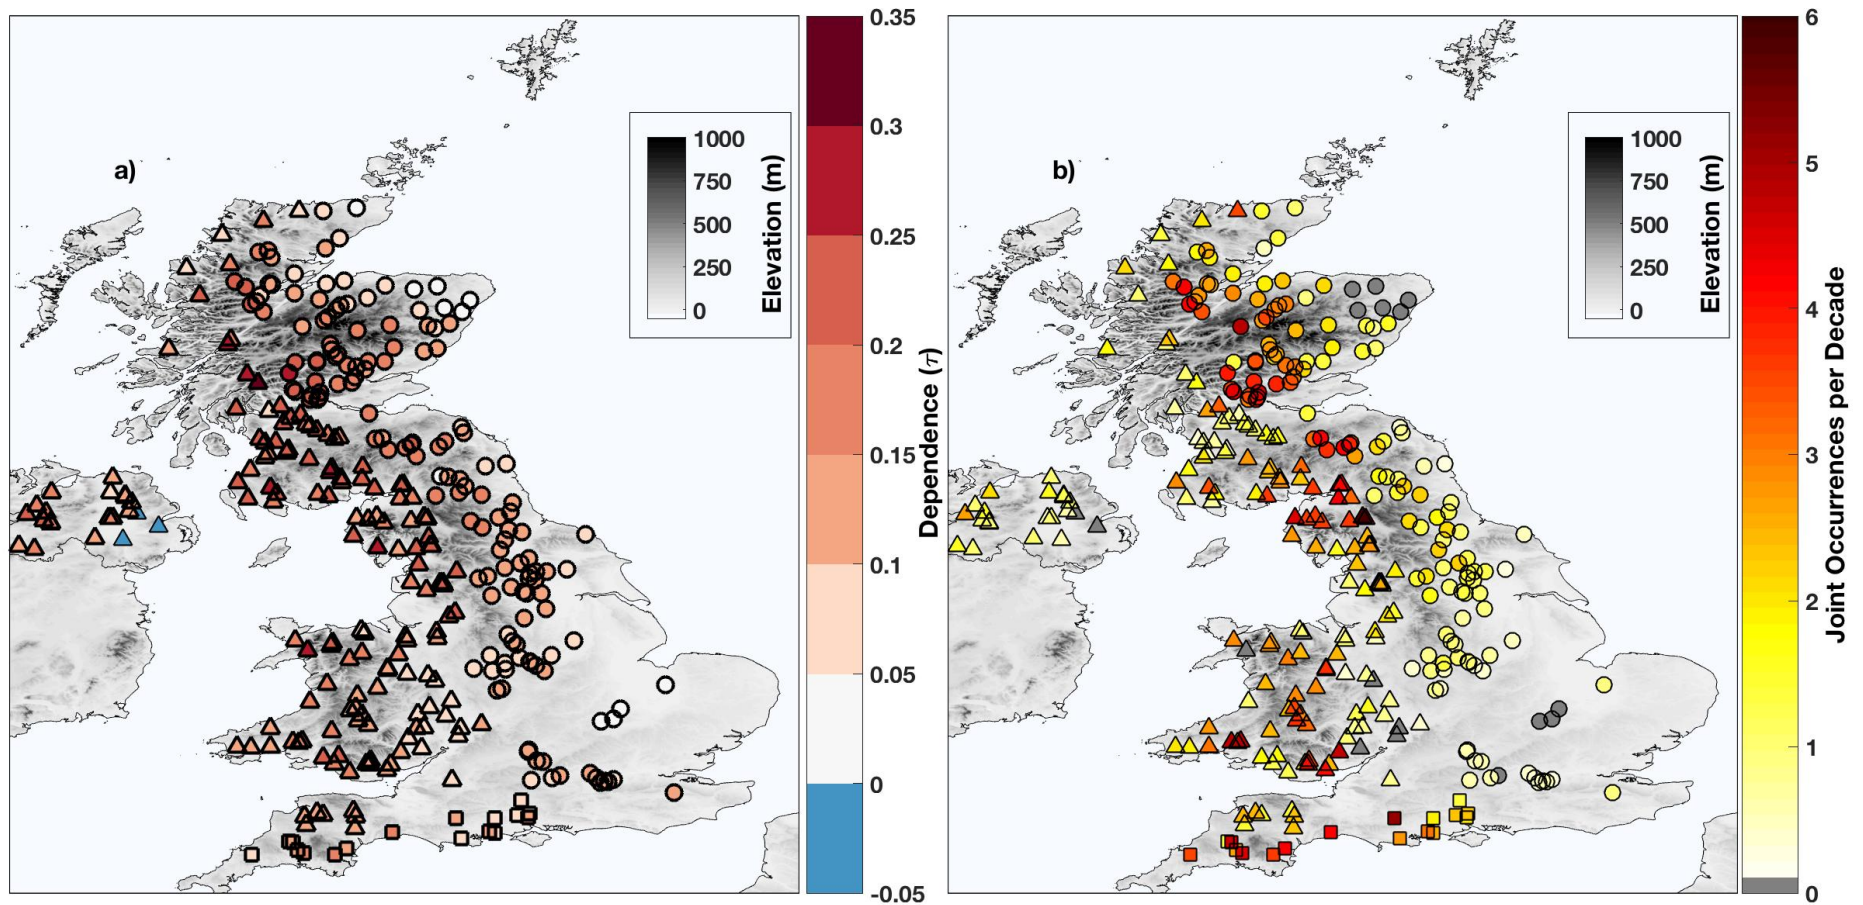

**Figure S5:** (a) Kendall's Rank Correlation  $\tau$  between daily maximum skew surge and daily maximum river discharge; and (b) number of joint occurrences per decade between extreme skew surge and extreme river discharge, at -1-day lag. Thick black lines in (a) represent that the dependence is statistically significant (95% confidence) at these sites.

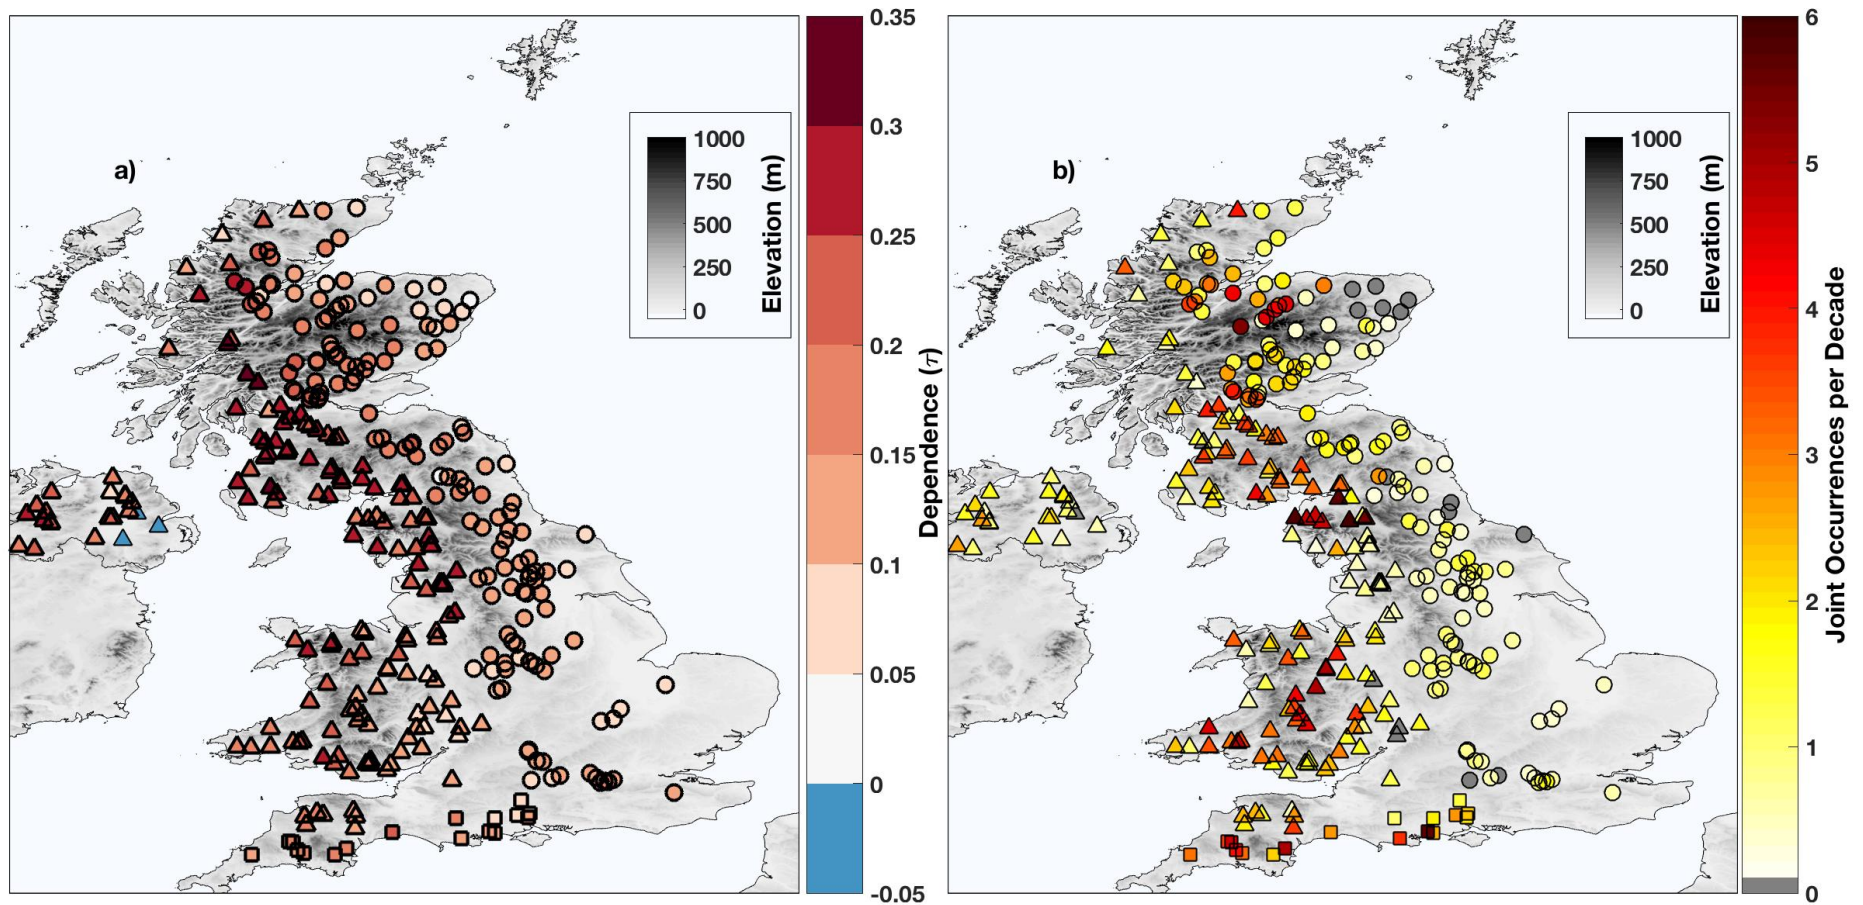

**Figure S6:** (a) Kendall's Rank Correlation  $\tau$  between daily maximum skew surge and daily maximum river discharge; and (b) number of joint occurrences per decade between extreme skew surge and extreme river discharge, at 0-day lag. Thick black lines in (a) represent that the dependence is statistically significant (95% confidence) at these sites.



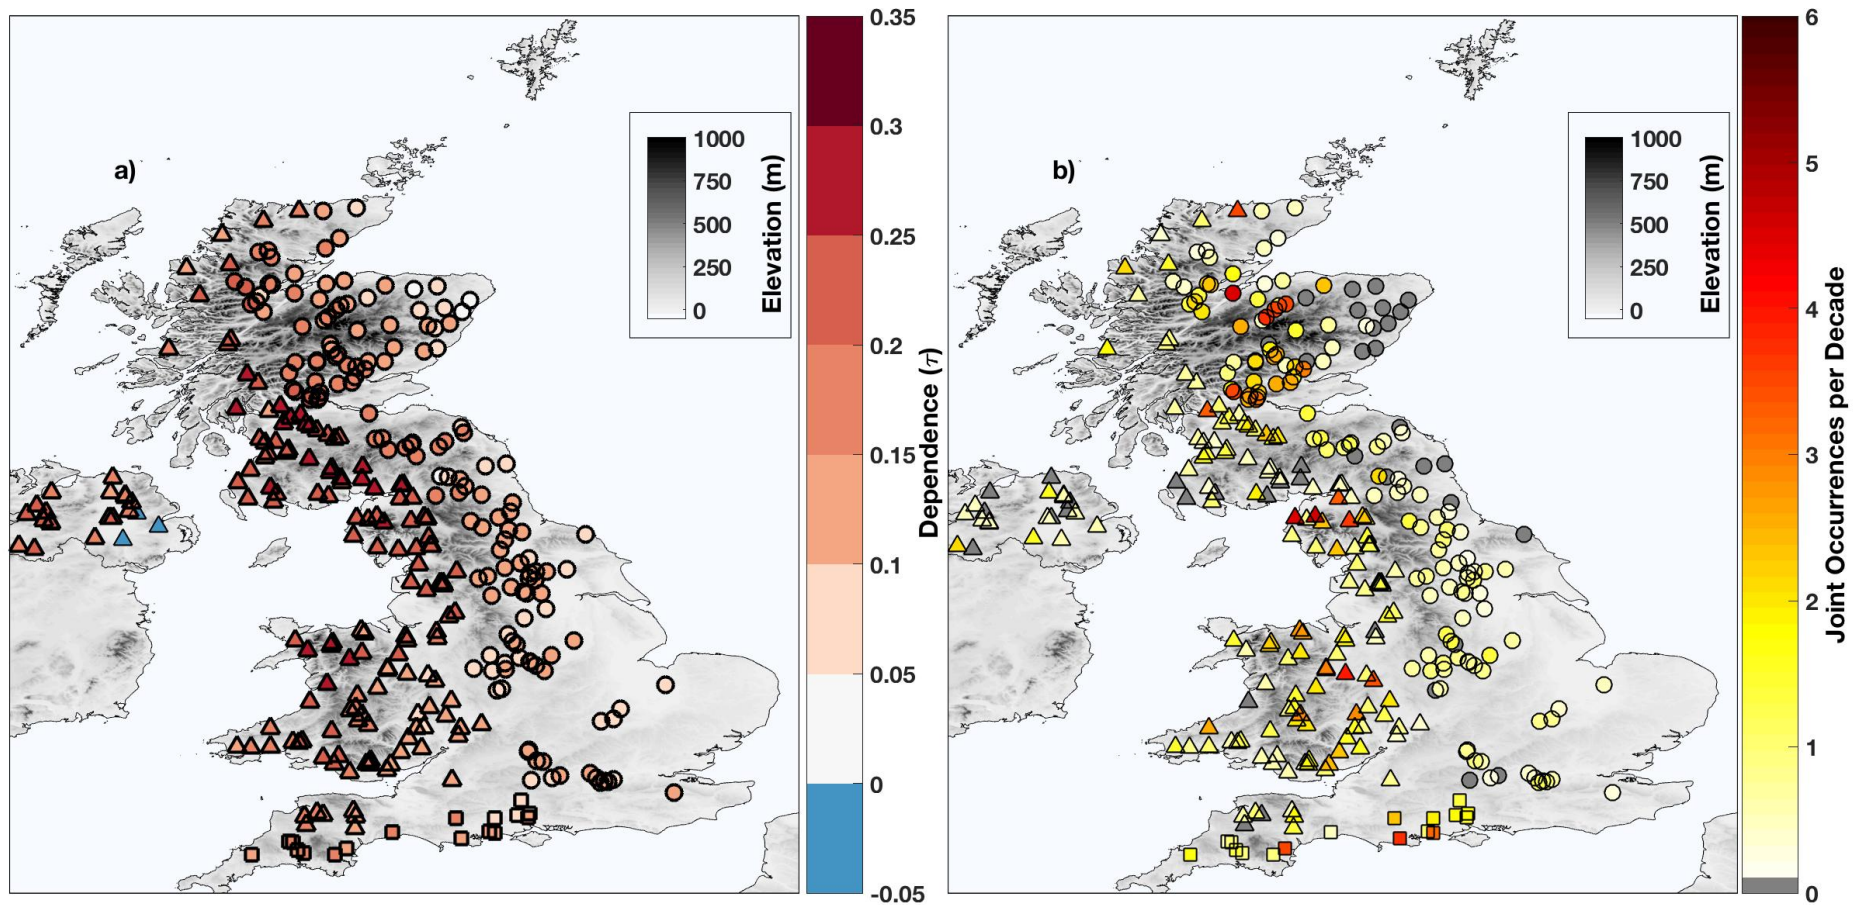

**Figure S7:** (a) Kendall's Rank Correlation  $\tau$  between daily maximum skew surge and daily maximum river discharge; and (b) number of joint occurrences per decade between extreme skew surge and extreme river discharge, at +1-day lag. Thick black lines in (a) represent that the dependence is statistically significant (95% confidence) at these sites.

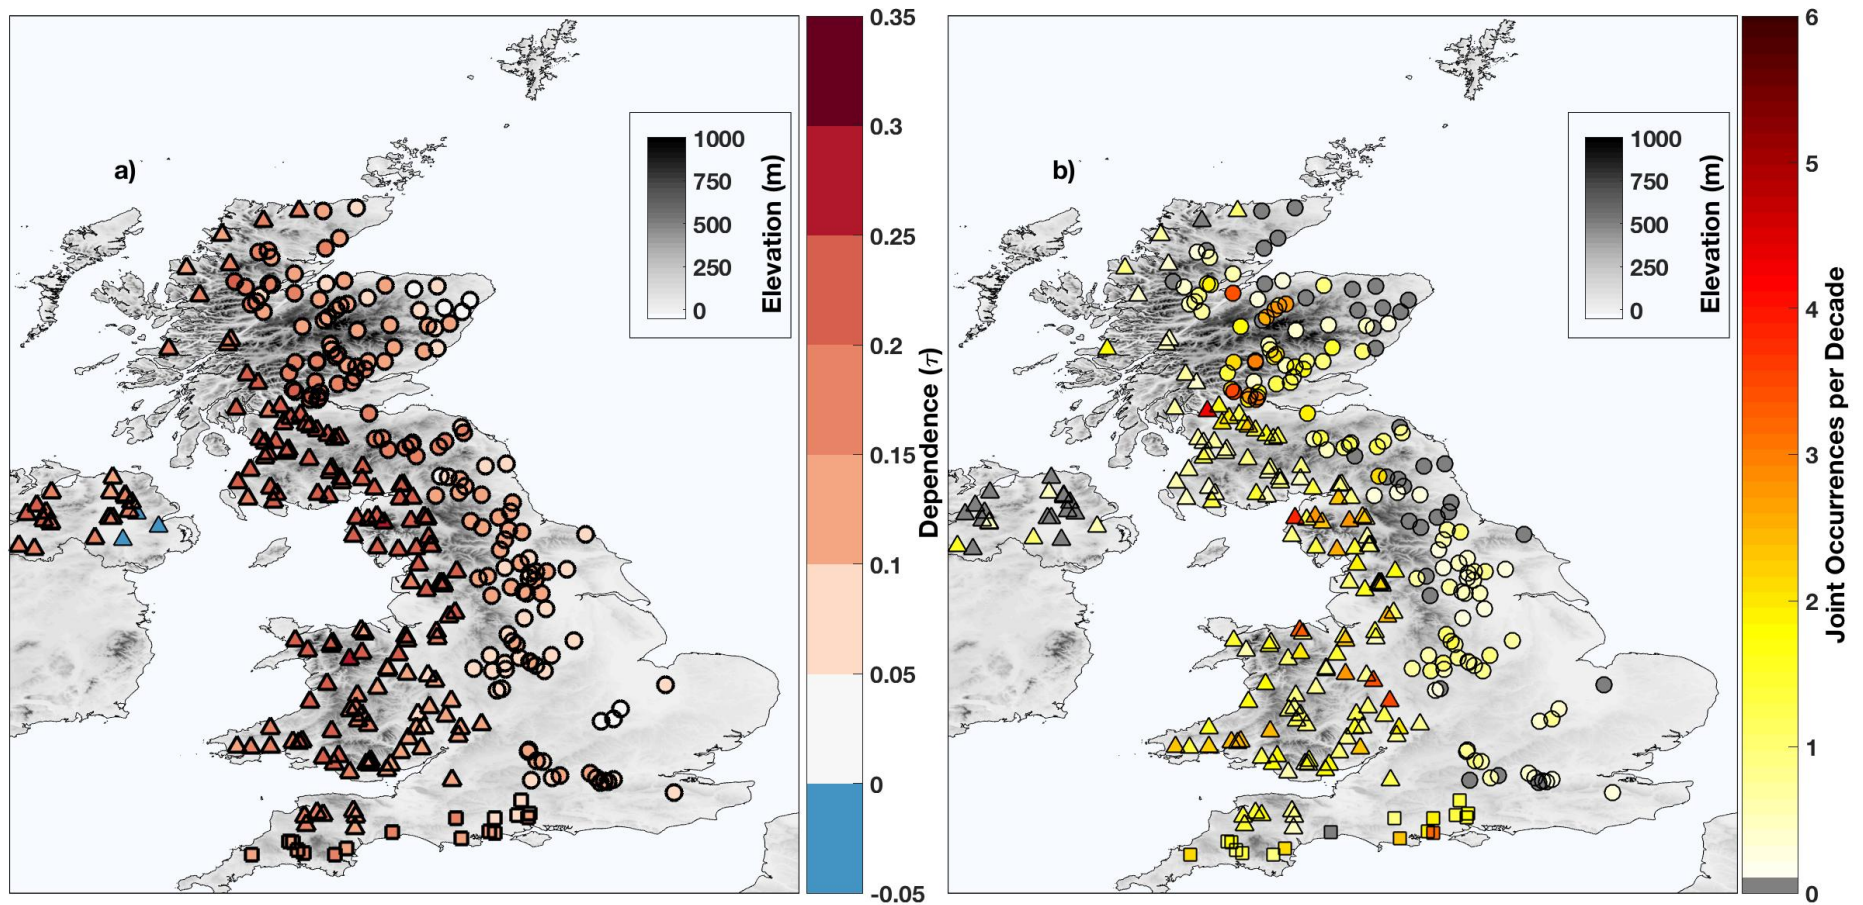

**Figure S8:** (a) Kendall's Rank Correlation  $\tau$  between daily maximum skew surge and daily maximum river discharge; and (b) number of joint occurrences per decade between extreme skew surge and extreme river discharge, at +2-day lag. Thick black lines in (a) represent that the dependence is statistically significant (95% confidence) at these sites.

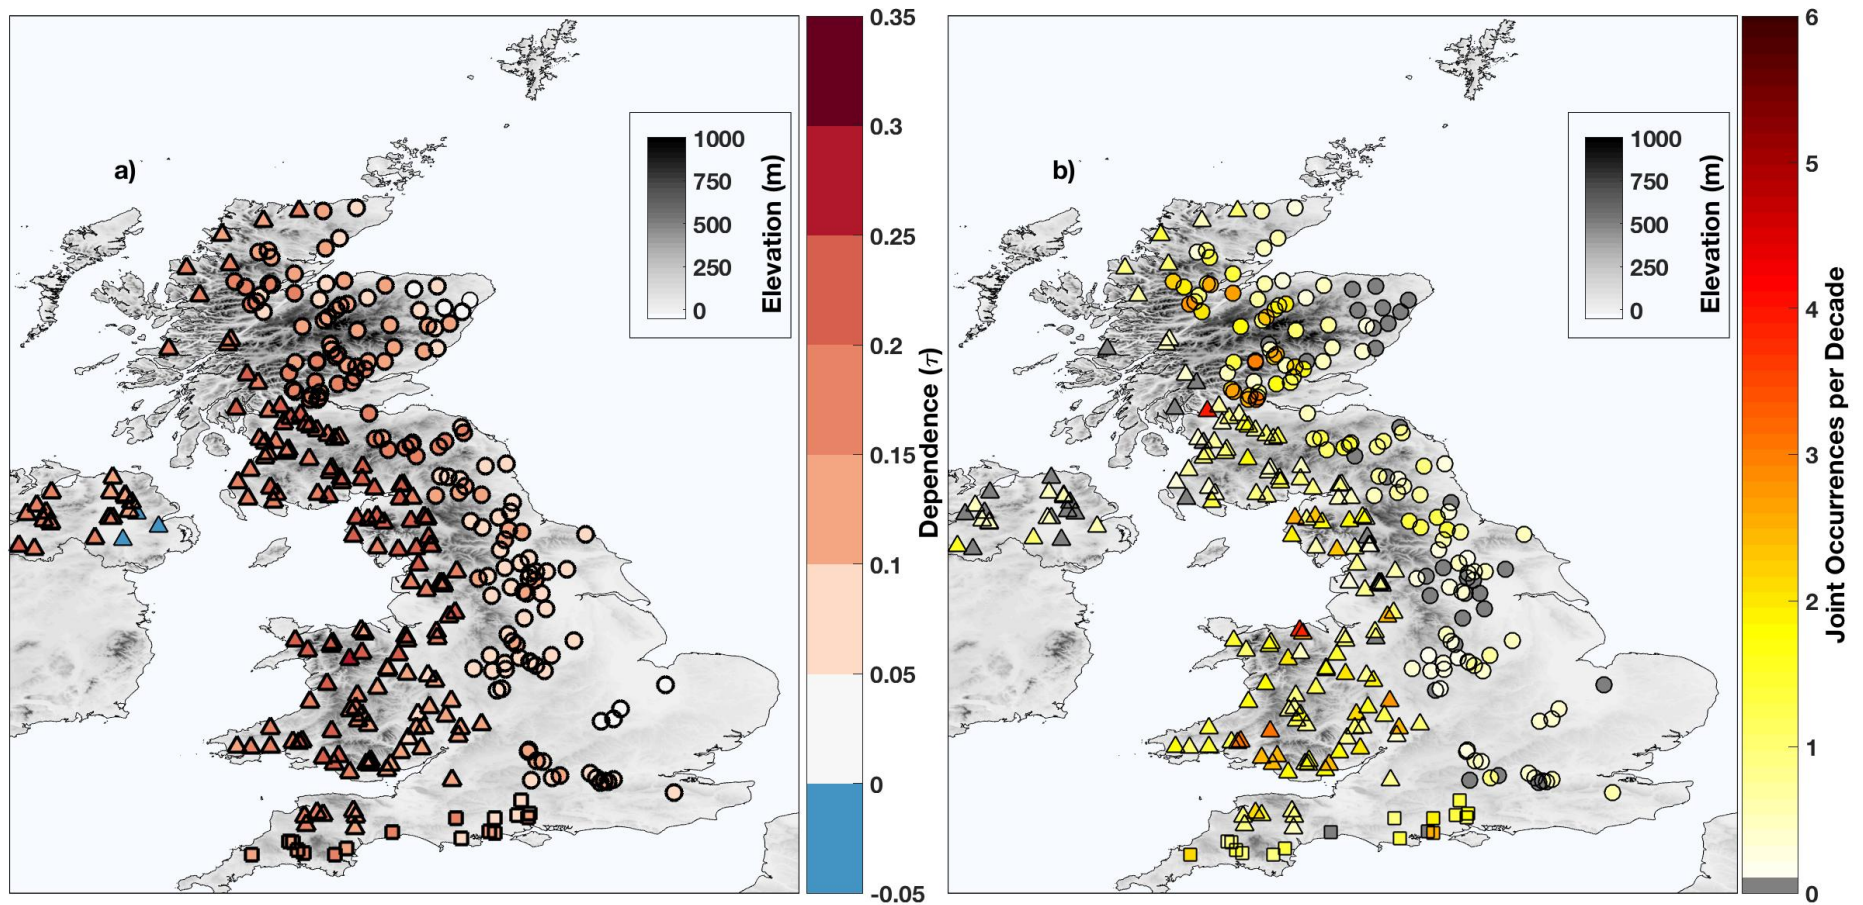

**Figure S9:** (a) Kendall's Rank Correlation  $\tau$  between daily maximum skew surge and daily maximum river discharge; and (b) number of joint occurrences per decade between extreme skew surge and extreme river discharge, at +3-day lag. Thick black lines in (a) represent that the dependence is statistically significant (95% confidence) at these sites.



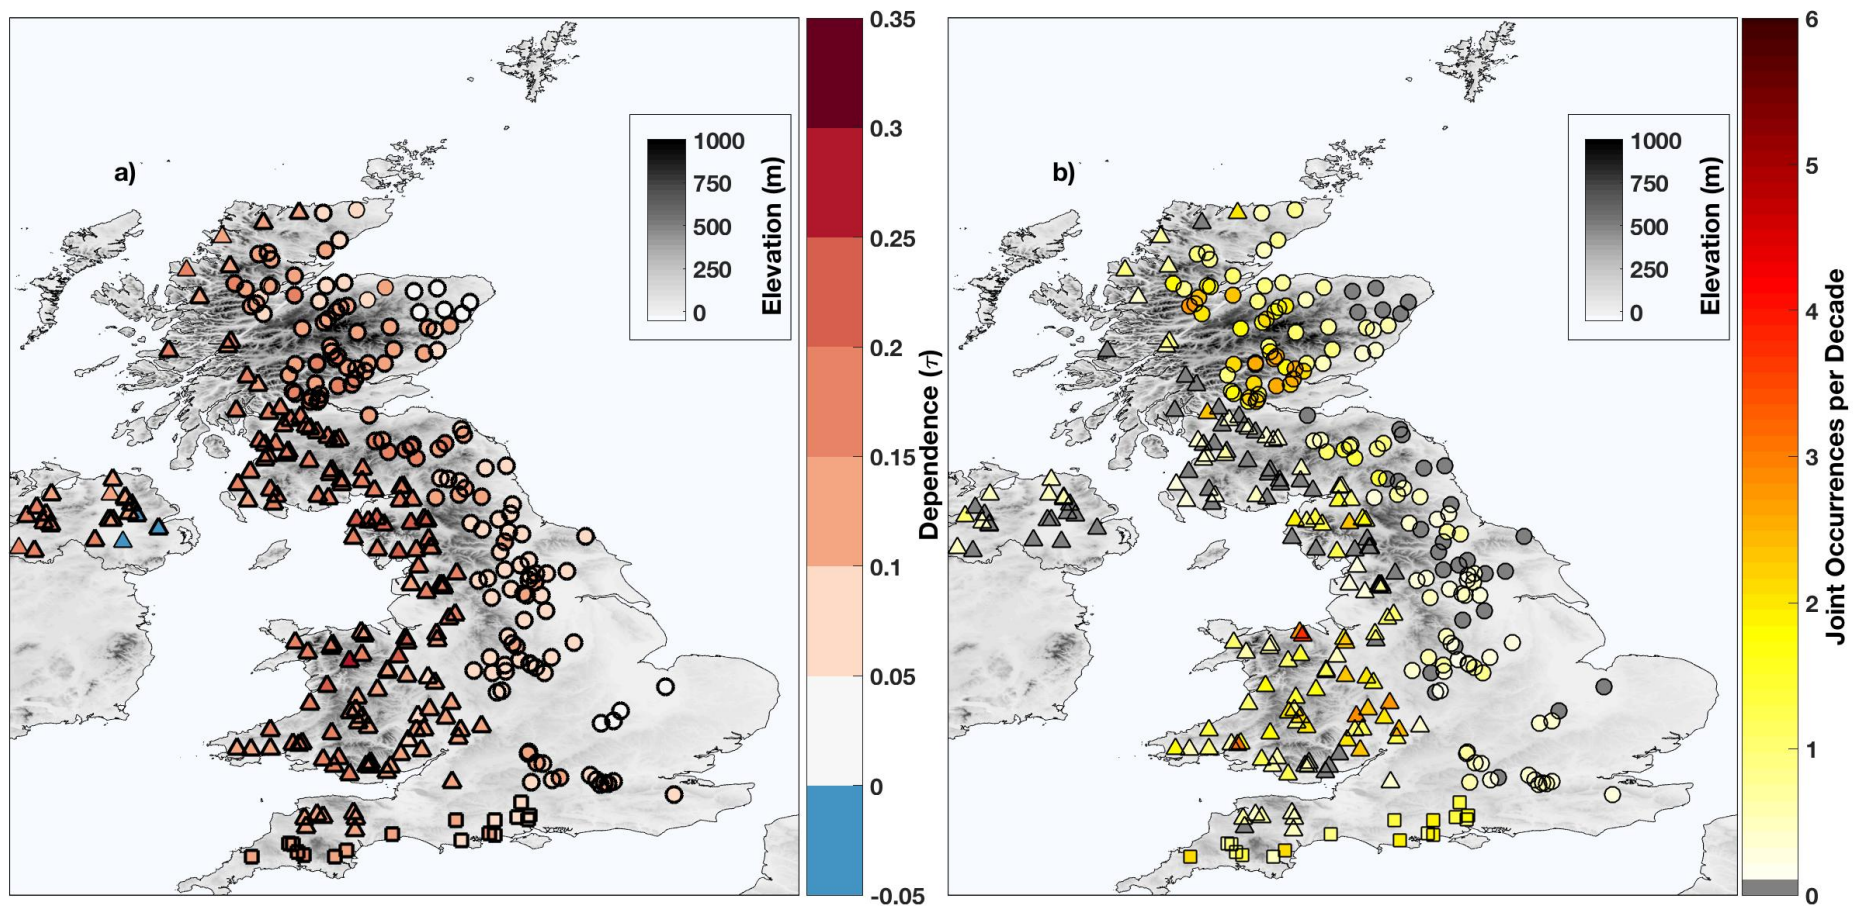

**Figure S10:** (a) Kendall's Rank Correlation  $\tau$  between daily maximum skew surge and daily maximum river discharge; and (b) number of joint occurrences per decade between extreme skew surge and extreme river discharge, at +4-day lag. Thick black lines in (a) represent that the dependence is statistically significant (95% confidence) at these sites.

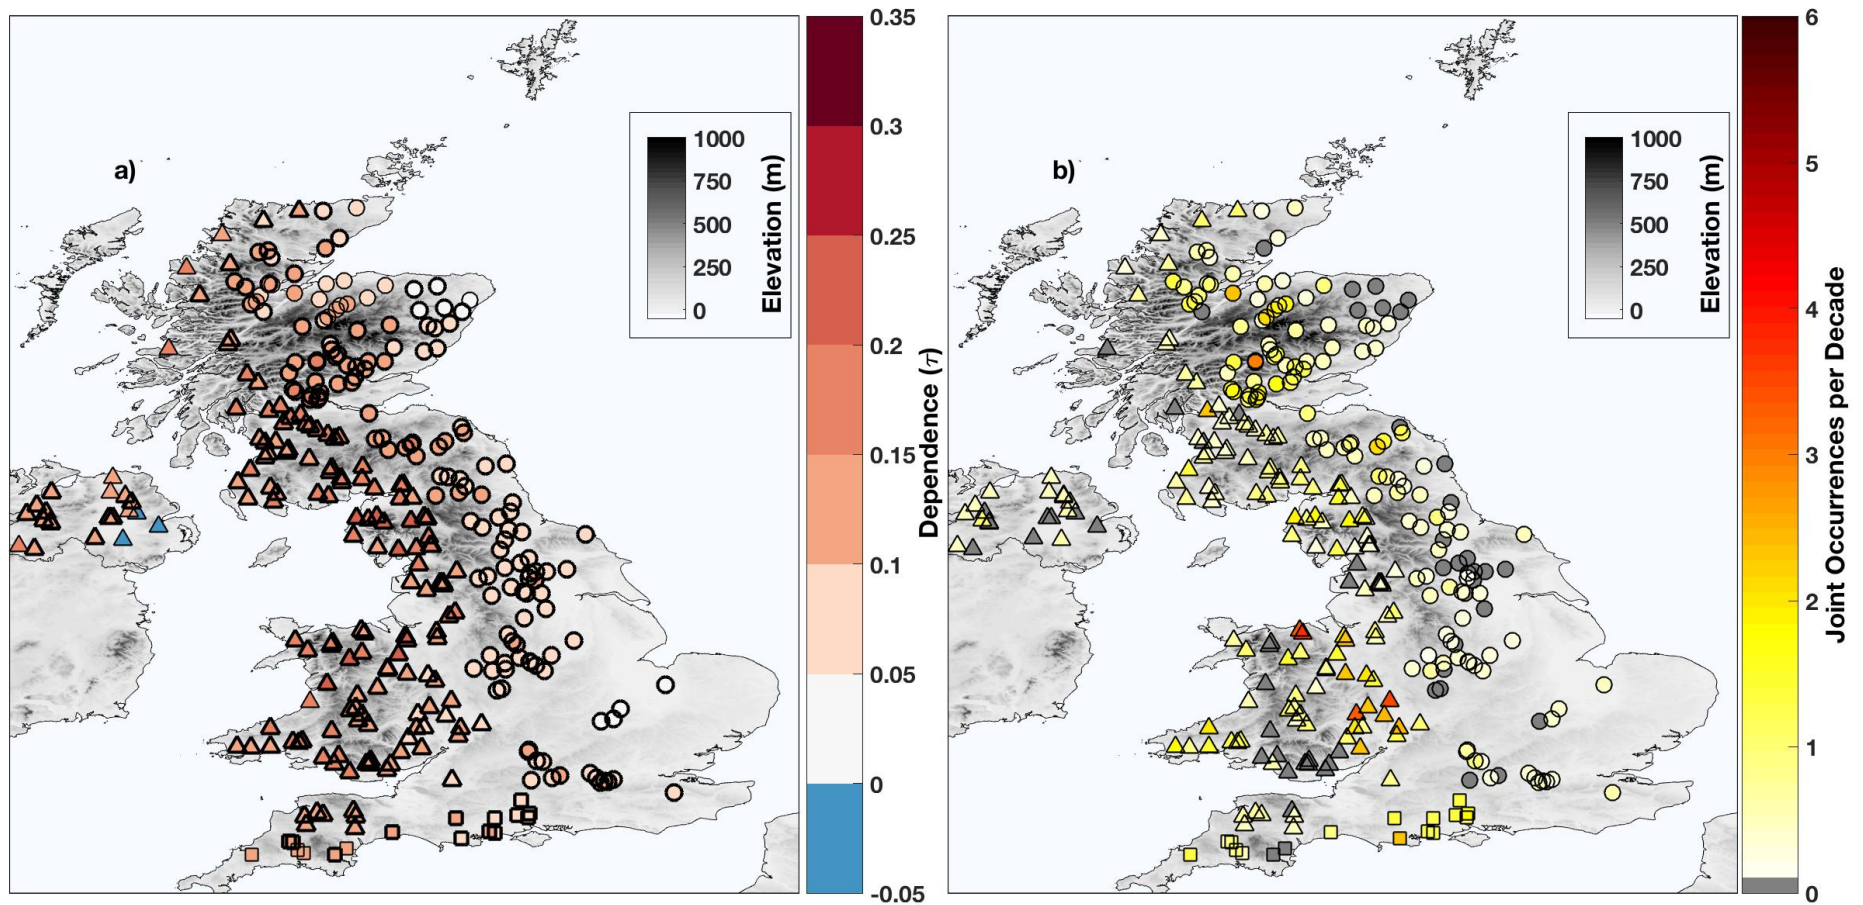

**Figure S11:** (a) Kendall's Rank Correlation  $\tau$  between daily maximum skew surge and daily maximum river discharge; and (b) number of joint occurrences per decade between extreme skew surge and extreme river discharge, at +5-day lag. Thick black lines in (a) represent that the dependence is statistically significant (95% confidence) at these sites.

### Surge Only Events

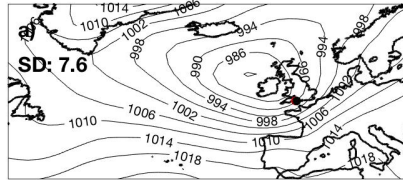

No. of Events: 51

Years of overlapping data: 23

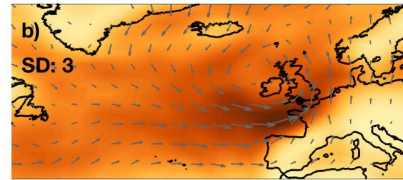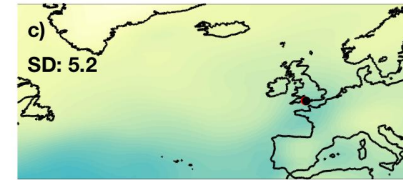

### Joint Occurrence Events

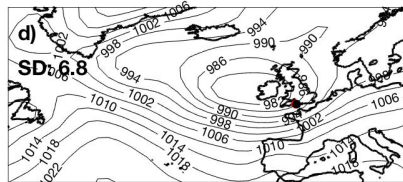

No. of Events: 6

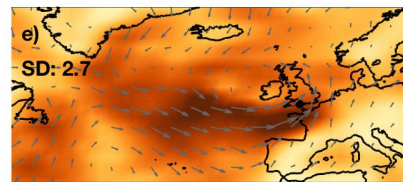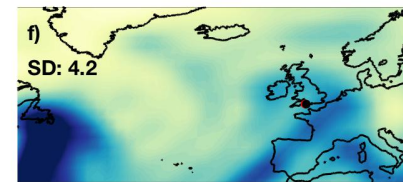

### River Only Events

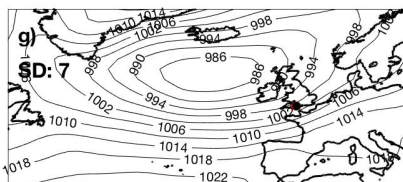

No. of Events: 34

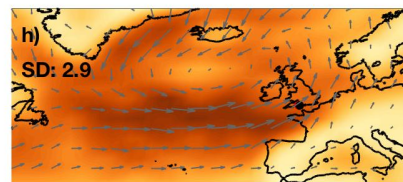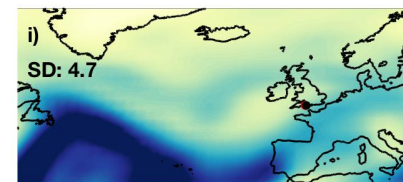

0 5 10 15 20  
Wind Speed (m/s)

0 5 10 15 20 25 30  
Precipitable Water Content (kg/m<sup>2</sup>)

**Figure S12:** Meteorology conditions for Weymouth (first column: sea level pressure (mbar); second column: wind speed (m/s) and direction (grey arrows); third column precipitable water content (kg/m<sup>2</sup>) during (a, b and c) high skew surge only events, (d, e and f) both high skew surge and high river discharge events and (g, h and i) extreme high river discharge only events. SD correspond to the averaged standard deviation over the grid for each variable across the selected events.



### Surge Only Events

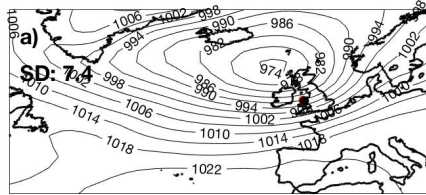

No. of Events: 43

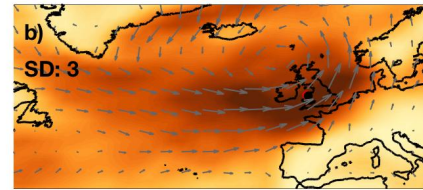

Years of overlapping data: 18

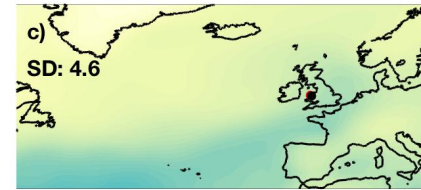

### Joint Occurrence Events

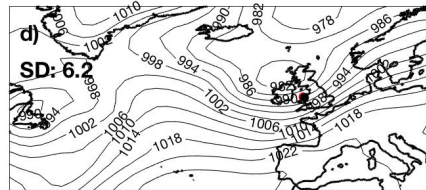

No. of Events: 2

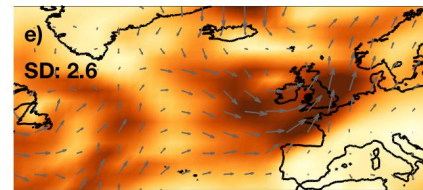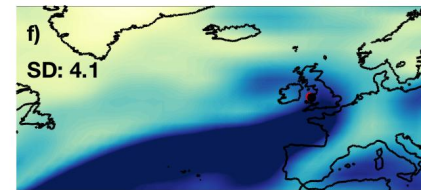

### River Only Events

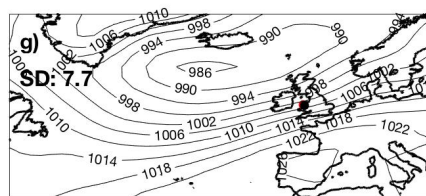

No. of Events: 36

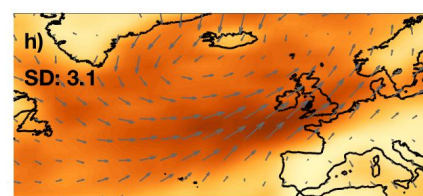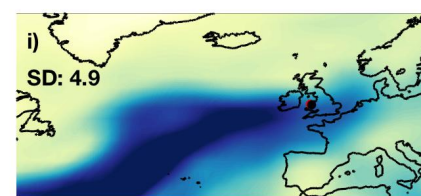

0 5 10 15 20 0 5 10 15 20 25 30  
Wind Speed (m/s) Precipitable Water Content (kg/m<sup>2</sup>)

**Figure S13:** Meteorology conditions for Barmouth (first column: sea level pressure (mbar); second column: wind speed (m/s) and direction (grey arrows); third column precipitable water content (kg/m<sup>2</sup>) during (a, b and c) high skew surge only events, (d, e and f) both high skew surge and high river discharge events and (g, h and i) extreme high river discharge only events. SD correspond to the averaged standard deviation over the grid for each variable across the selected events.

### Surge Only Events

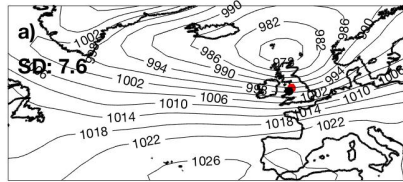

No. of Events: 46

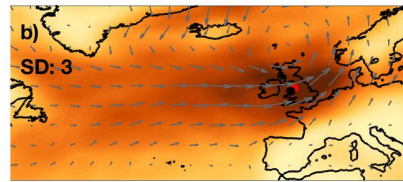

Years of overlapping data: 22

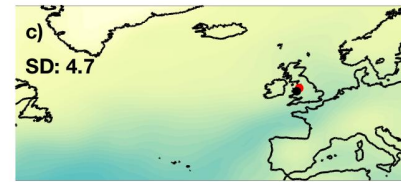

### Joint Occurrence Events

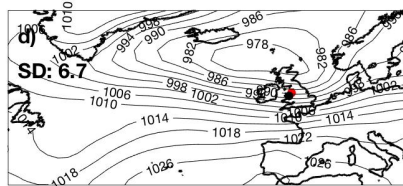

No. of Events: 8

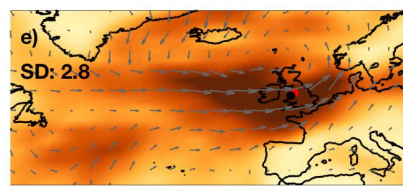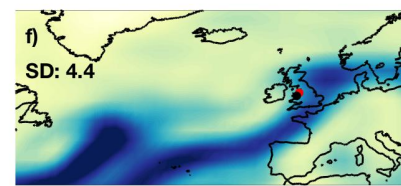

### River Only Events

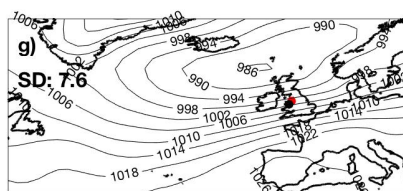

No. of Events: 34

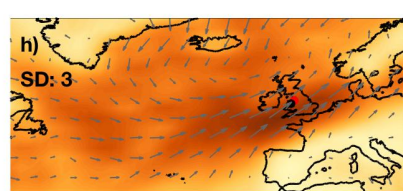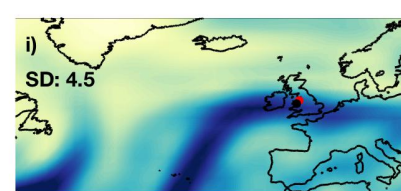

0 5 10 15 20  
Wind Speed (m/s)

0 5 10 15 20 25 30  
Precipitable Water Content (kg/m<sup>2</sup>)

**Figure S14:** Meteorology conditions for Liverpool (first column: sea level pressure (mbar); second column: wind speed (m/s) and direction (grey arrows); third column precipitable water content (kg/m<sup>2</sup>) during (a, b and c) high skew surge only events, (d, e and f) both high skew surge and high river discharge events and (g, h and i) extreme high river discharge only events. SD correspond to the averaged standard deviation over the grid for each variable across the selected events.

### Surge Only Events

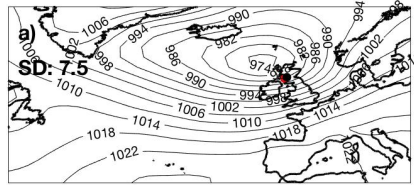

No. of Events: 69

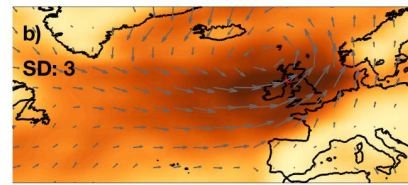

Years of overlapping data: 33

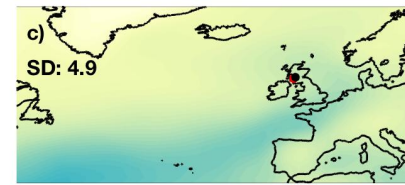

### Joint Occurrence Events

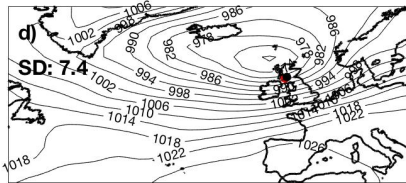

No. of Events: 12

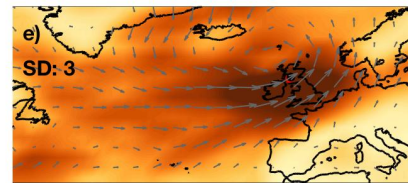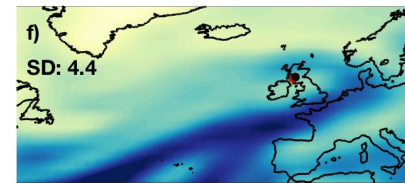

### River Only Events

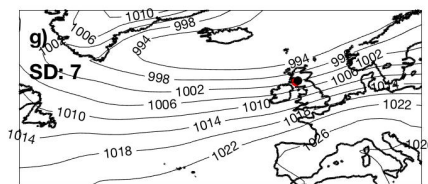

No. of Events: 53

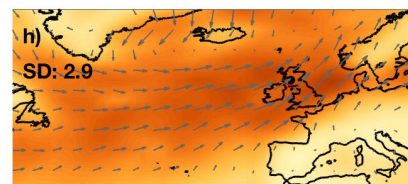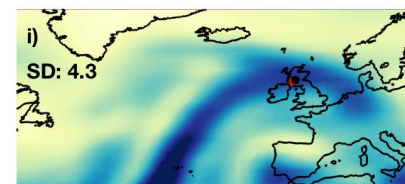

0 5 10 15 20  
Wind Speed (m/s)

0 5 10 15 20 25 30  
Precipitable Water Content (kg/m<sup>2</sup>)

**Figure S15:** Meteorology conditions for Millport (first column: sea level pressure (mbar); second column: wind speed (m/s) and direction (grey arrows); third column precipitable water content (kg/m<sup>2</sup>) during (a, b and c) high skew surge only events, (d, e and f) both high skew surge and high river discharge events and (g, h and i) extreme high river discharge only events. SD correspond to the averaged standard deviation over the grid for each variable across the selected events.



### Surge Only Events

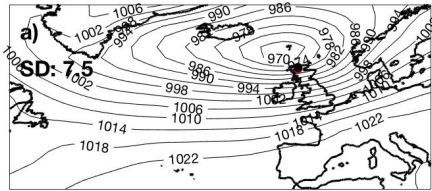

No. of Events: 73

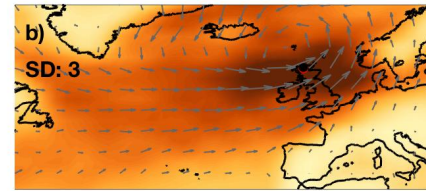

Years of overlapping data: 32

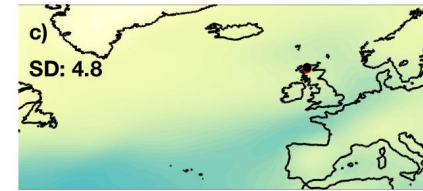

### Joint Occurrence Events

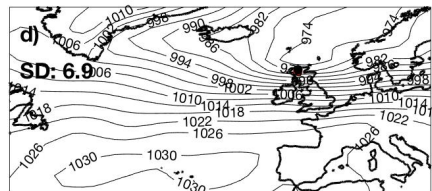

No. of Events: 3

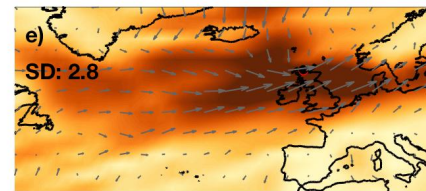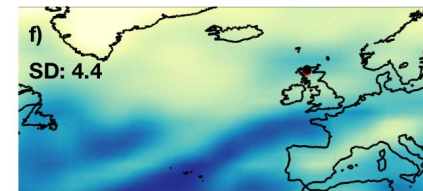

### River Only Events

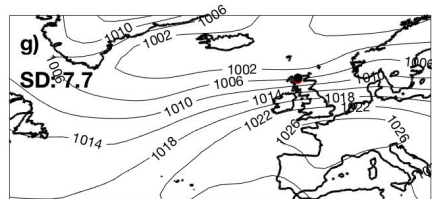

No. of Events: 57

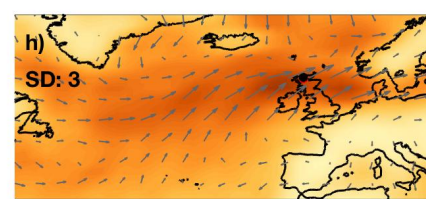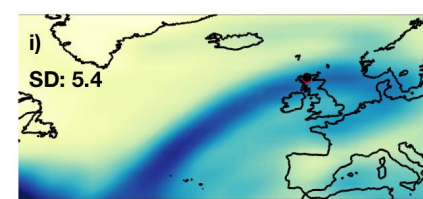

0 5 10 15 20 0 5 10 15 20 25 30  
Wind Speed (m/s) Precipitable Water Content (kg/m<sup>2</sup>)

**Figure S16:** Meteorology conditions for Ullapool (first column: sea level pressure (mbar); second column: wind speed (m/s) and direction (grey arrows); third column precipitable water content (kg/m<sup>2</sup>) during (a, b and c) high skew surge only events, (d, e and f) both high skew surge and high river discharge events and (g, h and i) extreme high river discharge only events. SD correspond to the averaged standard deviation over the grid for each variable across the selected events.

### Surge Only Events

No. of Events: 82

Years of overlapping data: 34

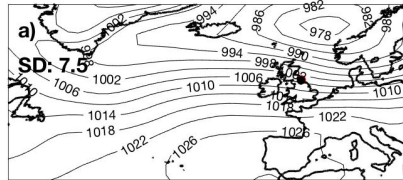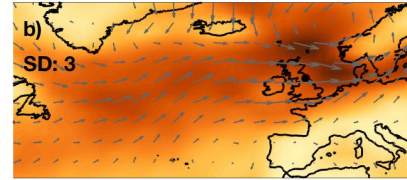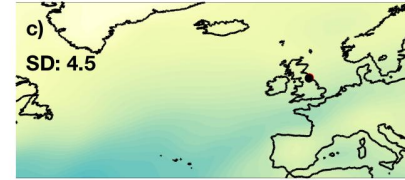

### Joint Occurrence Events

**NO EVENTS**

### River Only Events

No. of Events: 70

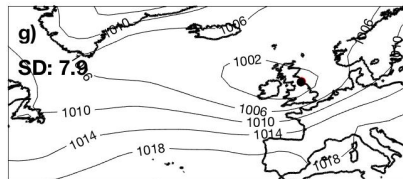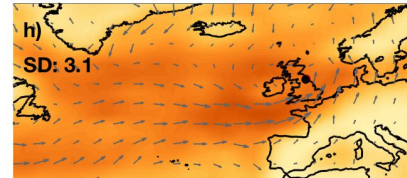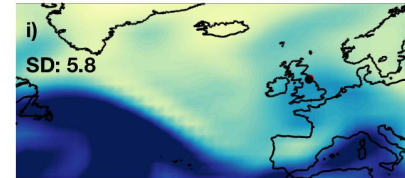

0 5 10 15 20  
Wind Speed (m/s)

0 5 10 15 20 25 30  
Precipitable Water Content (kg/m<sup>2</sup>)

**Figure S17:** Meteorology conditions for North Shields (first column: sea level pressure (mbar); second column: wind speed (m/s) and direction (grey arrows); third column precipitable water content (kg/m<sup>2</sup>) during (a, b and c) high skew surge only events, (d, e and f) both high skew surge and high river discharge events and (g, h and i) extreme high river discharge only events. SD correspond to the averaged standard deviation over the grid for each variable across the selected events.

### Surge Only Events

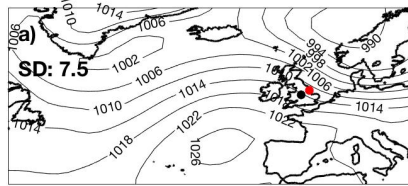

No. of Events: 110

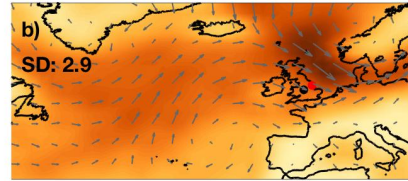

Years of overlapping data: 46

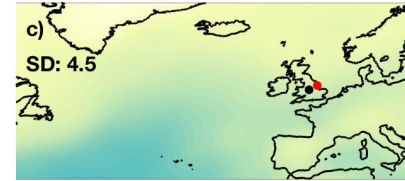

### Joint Occurrence Events

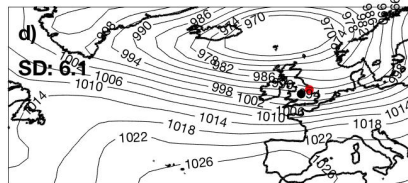

No. of Events: 5

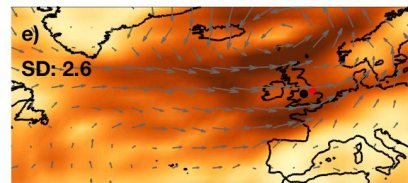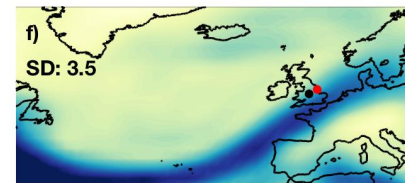

### River Only Events

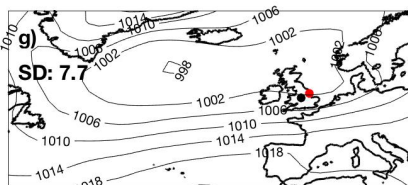

No. of Events: 85

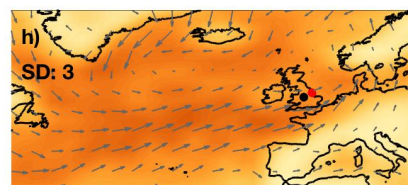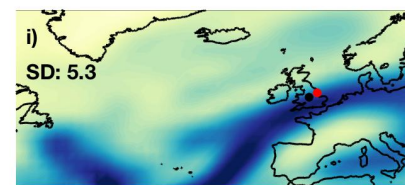

0 5 10 15 20  
Wind Speed (m/s)

0 5 10 15 20 25 30  
Precipitable Water Content (kg/m<sup>2</sup>)

**Figure S18:** Meteorology conditions for Immingham (first column: sea level pressure (mbar); second column: wind speed (m/s) and direction (grey arrows); third column precipitable water content (kg/m<sup>2</sup>) during (a, b and c) high skew surge only events, (d, e and f) both high skew surge and high river discharge events and (g, h and i) extreme high river discharge only events. SD correspond to the averaged standard deviation over the grid for each variable across the selected events.



### Surge Only Events

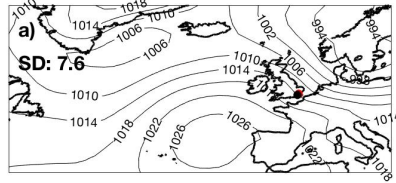

No. of Events: 91

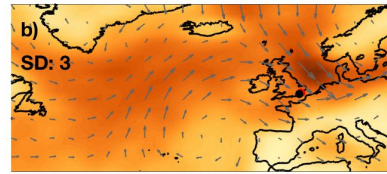

Years of overlapping data: 37

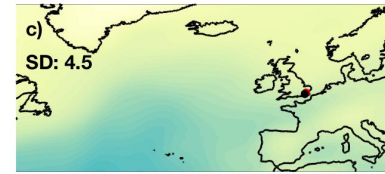

### Joint Occurrence Events

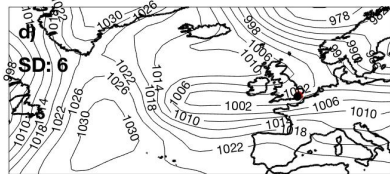

No. of Events: 2

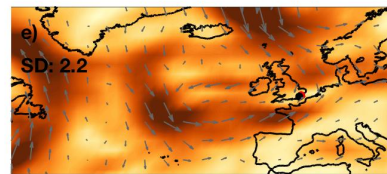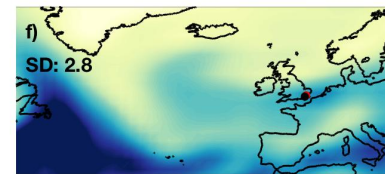

### River Only Events

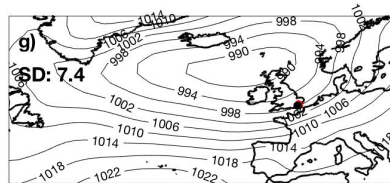

No. of Events: 68

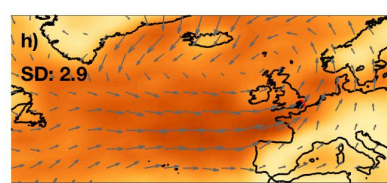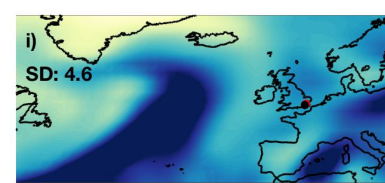

0 5 10 15 20  
Wind Speed (m/s)

0 5 10 15 20 25 30  
Precipitable Water Content (kg/m<sup>2</sup>)

**Figure S19:** Meteorology conditions for Sheerness (first column: sea level pressure (mbar); second column: wind speed (m/s) and direction (grey arrows); third column precipitable water content (kg/m<sup>2</sup>) during (a, b and c) high skew surge only events, (d, e and f) both high skew surge and high river discharge events and (g, h and i) extreme high river discharge only events. SD correspond to the averaged standard deviation over the grid for each variable across the selected events.

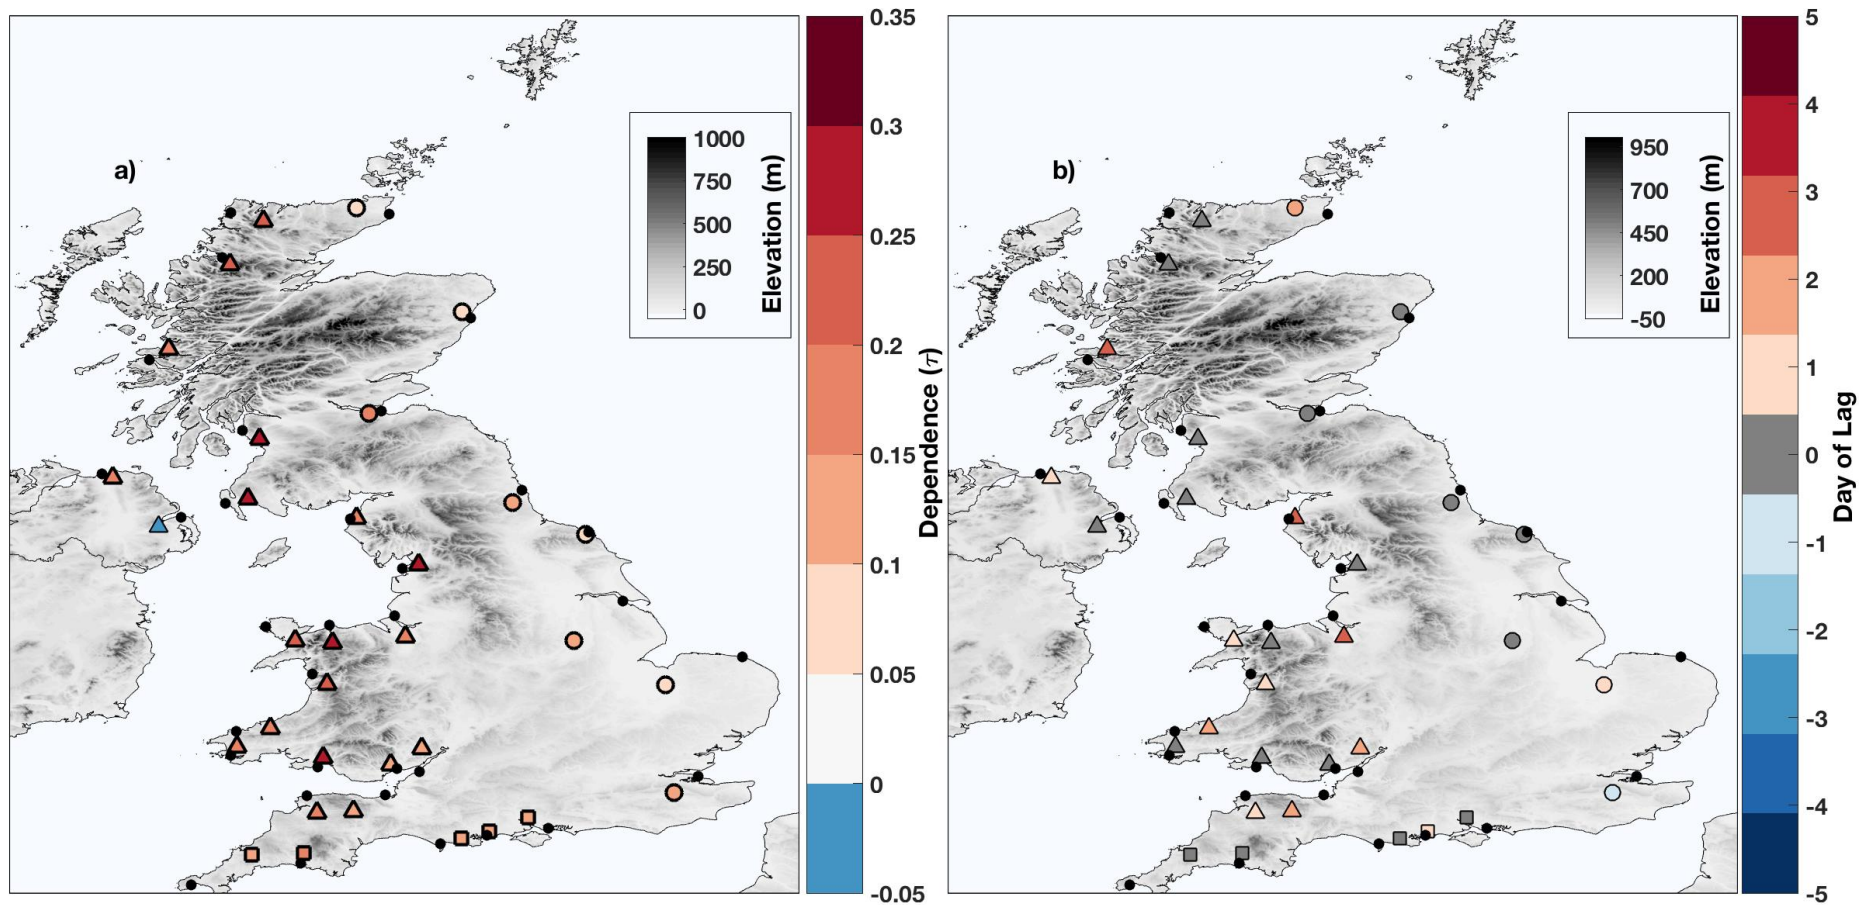

**Figure S20:** (a) Kendall's Rank Correlation  $\tau$  between daily maximum skew surge and daily maximum river discharge, at 0-day lag, for just the river discharge sites closest to the tide gauge sites. Thick black lines in (a) represent that the dependence is statistically significant (95% confidence) at these sites. (b) The lag day when the Kendall's Rank Correlation  $\tau$  is maximum between daily maximum skew surge and daily maximum river discharge for just the river discharge sites closest to the tide gauge sites.



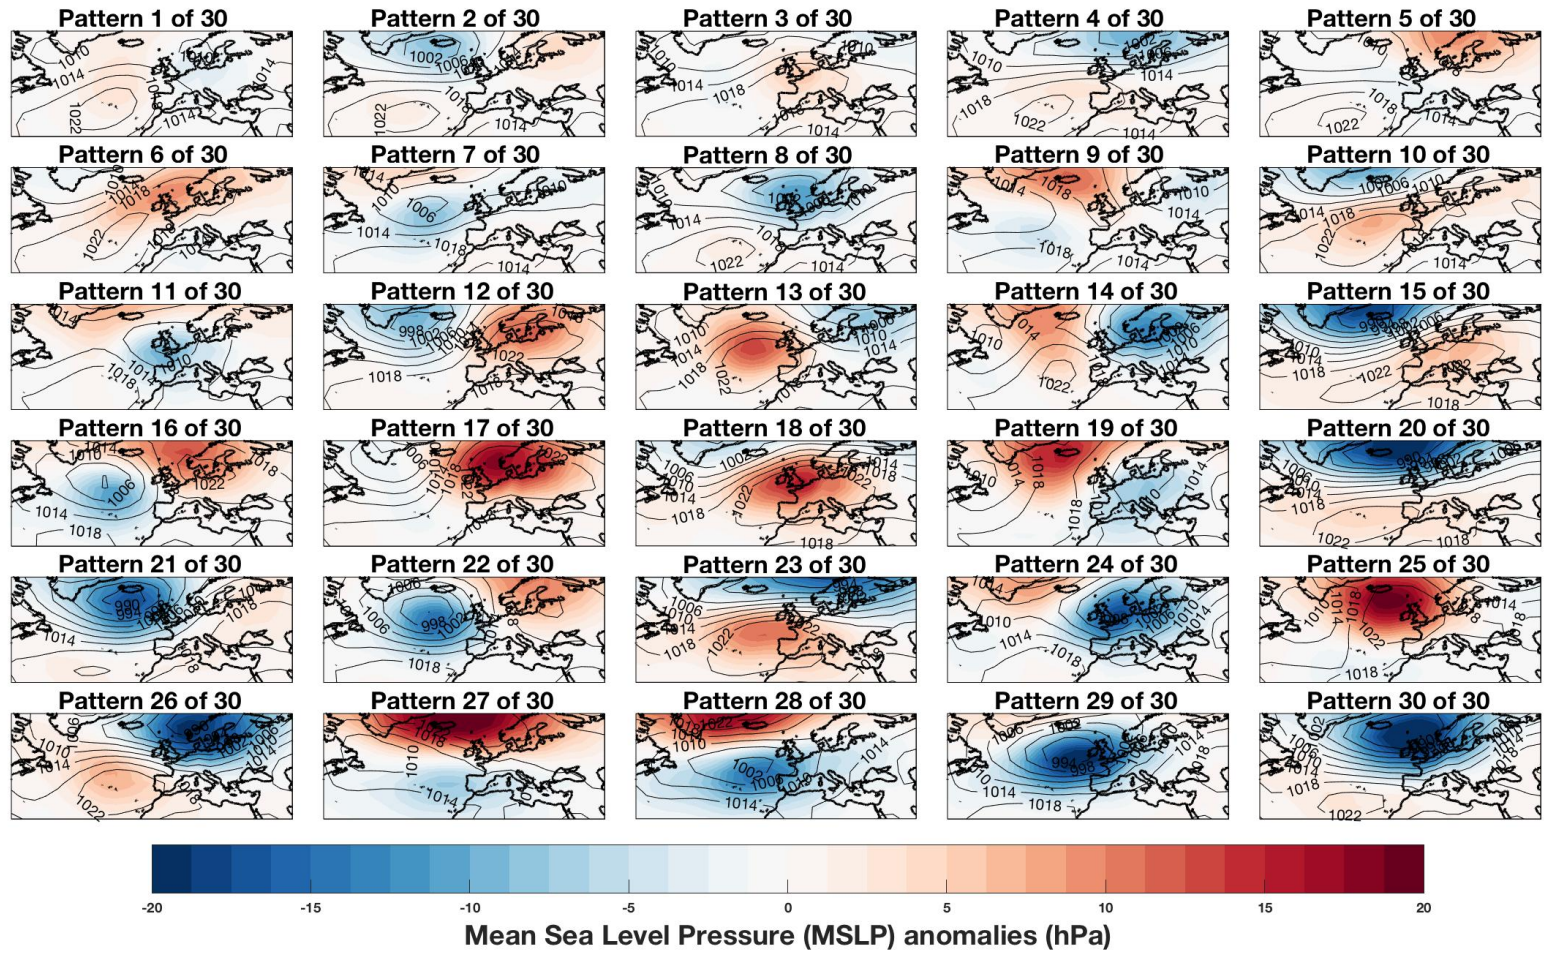

**Figure S21:** The set of 30 weather patterns derived by Neal et al. (2016) and used in Coastal Decider. Fill contours show pressure anomalies relative to the 1850 to 2003 climatology from the European and North Atlantic Daily to Multi-decadal Climate Variability Mean SLP reanalysis.



**Table S1:** Study data, including joint occurrences per decade; dependence of daily skew surge and river flow; dependence of river flow conditional on extreme surge and dependence of skew surge conditional on extreme river flow.

| Tide Gauge | River Gauge ID | River     | River Gauge Location | Years of Overlapping Data | Joint Occurrences (per decade) | Dependence ( $\tau$ ) | Dependence ( $\tau$ , river conditional on extreme surge) | Dependence ( $\tau$ , surge conditional on extreme river) |
|------------|----------------|-----------|----------------------|---------------------------|--------------------------------|-----------------------|-----------------------------------------------------------|-----------------------------------------------------------|
| Aberdeen   | 12002          | Dee       | Park                 | 35.26                     | 0.28                           | 0.14                  | 0.12                                                      | -0.02                                                     |
| Aberdeen   | 12001          | Dee       | Woodend              | 49.29                     | 1.22                           | 0.15                  | 0.15                                                      | 0.09                                                      |
| Aberdeen   | 12003          | Dee       | Polhollick           | 32.84                     | 0.30                           | 0.16                  | 0.14                                                      | 0.10                                                      |
| Aberdeen   | 11001          | Don       | Parkhill             | 37.90                     | 0.00                           | 0.05                  | -0.03                                                     | 0.09                                                      |
| Aberdeen   | 13007          | North Esk | Logie Mill           | 32.42                     | 0.31                           | 0.12                  | 0.11                                                      | 0.01                                                      |
| Aberdeen   | 9002           | Deveron   | Muireisk             | 42.37                     | 0.00                           | 0.05                  | 0.01                                                      | 0.07                                                      |
| Aberdeen   | 11002          | Don       | Haughton             | 38.32                     | 0.00                           | 0.06                  | 0.00                                                      | 0.00                                                      |
| Aberdeen   | 13008          | South Esk | Brechin              | 30.46                     | 0.66                           | 0.14                  | 0.14                                                      | -0.20                                                     |
| Aberdeen   | 12007          | Dee       | Mar Lodge            | 30.67                     | 0.33                           | 0.17                  | 0.16                                                      | 0.19                                                      |
| Aberdeen   | 11003          | Don       | Bridge of Alford     | 34.82                     | 0.00                           | 0.06                  | 0.08                                                      | 0.06                                                      |
| Aberdeen   | 9001           | Deveron   | Avochie              | 42.37                     | 0.00                           | 0.05                  | 0.07                                                      | 0.12                                                      |
| Aberdeen   | 10003          | Ythan     | Ellon                | 30.10                     | 0.00                           | 0.03                  | -0.02                                                     | 0.02                                                      |
| Aberdeen   | 12008          | Feugh     | Heugh Head           | 28.67                     | 0.35                           | 0.09                  | 0.07                                                      | -0.06                                                     |
| Aberdeen   | 13012          | South Esk | Gella Bridge         | 22.78                     | 0.44                           | 0.17                  | 0.13                                                      | -0.13                                                     |

|           |       |        |                    |       |      |      |      |       |
|-----------|-------|--------|--------------------|-------|------|------|------|-------|
| Avonmouth | 54057 | Severn | Haw Bridge         | 26.35 | 0.00 | 0.10 | 0.14 | -0.04 |
| Avonmouth | 54032 | Severn | Saxons Lode        | 26.34 | 0.00 | 0.10 | 0.13 | -0.06 |
| Avonmouth | 55023 | Wye    | Redbrook           | 27.47 | 1.46 | 0.11 | 0.15 | 0.01  |
| Avonmouth | 54001 | Severn | Bewdley            | 27.47 | 1.09 | 0.11 | 0.13 | 0.09  |
| Avonmouth | 54095 | Severn | Buildwas           | 22.57 | 0.00 | 0.11 | 0.12 | 0.19  |
| Avonmouth | 55002 | Wye    | Belmont            | 27.46 | 2.55 | 0.13 | 0.12 | 0.08  |
| Avonmouth | 54005 | Severn | Montford           | 27.47 | 1.82 | 0.13 | 0.17 | 0.14  |
| Avonmouth | 55007 | Wye    | Erwood             | 27.45 | 4.01 | 0.15 | 0.09 | -0.04 |
| Avonmouth | 54028 | Vyrnwy | Llanymynech        | 26.35 | 4.55 | 0.15 | 0.16 | -0.09 |
| Avonmouth | 53018 | Avon   | Bathford           | 26.34 | 1.14 | 0.11 | 0.24 | 0.04  |
| Avonmouth | 54029 | Teme   | Knightsford Bridge | 26.35 | 1.52 | 0.10 | 0.15 | -0.04 |
| Avonmouth | 54002 | Avon   | Evesham            | 27.47 | 1.46 | 0.13 | 0.11 | -0.10 |
| Avonmouth | 54014 | Severn | Abermule           | 26.35 | 4.55 | 0.14 | 0.19 | -0.04 |
| Avonmouth | 54008 | Teme   | Tenbury            | 27.47 | 2.18 | 0.10 | 0.13 | 0.00  |
| Avonmouth | 55003 | Lugg   | Lugwardine         | 25.12 | 0.80 | 0.09 | 0.23 | 0.02  |
| Avonmouth | 55012 | Irfon  | Cilmery            | 26.35 | 3.04 | 0.17 | 0.18 | -0.03 |
| Avonmouth | 55016 | Ithon  | Disserth           | 26.25 | 3.81 | 0.14 | 0.15 | 0.08  |
| Avonmouth | 54080 | Severn | Dolwen             | 22.61 | 3.98 | 0.14 | 0.21 | 0.01  |
| Avonmouth | 54012 | Tern   | Walcot             | 27.44 | 1.46 | 0.09 | 0.09 | 0.21  |
| Avonmouth | 54038 | Tanat  | Llanyblodwel       | 25.62 | 4.29 | 0.13 | 0.25 | -0.14 |

|             |        |                |                  |       |      |       |       |       |
|-------------|--------|----------------|------------------|-------|------|-------|-------|-------|
| Avonmouth   | 55026  | Wye            | Ddol Farm        | 27.47 | 3.28 | 0.16  | 0.12  | -0.16 |
| Avonmouth   | 55029  | Monnow         | Grosmont         | 27.47 | 1.46 | 0.11  | 0.14  | 0.04  |
| Avonmouth   | 55021  | Lugg           | Butts Bridge     | 26.08 | 3.45 | 0.08  | 0.09  | -0.10 |
| Avonmouth   | 55032  | Elan           | Caban Dam        | 27.30 | 2.20 | 0.10  | 0.00  | -0.15 |
| Bangor      | 205004 | Lagan          | Newforge         | 17.52 | 0.57 | 0.00  | -0.14 | 0.01  |
| Bangor      | 203018 | Six-Mile Water | Antrim           | 17.52 | 0.00 | -0.01 | -0.11 | 0.04  |
| Bangor      | 203097 | Upper Bann     | Moyallen         | 17.52 | 0.57 | 0.00  | -0.18 | 0.06  |
| Barmouth    | 64001  | Dyfi           | Dyfi Bridge      | 17.82 | 1.12 | 0.25  | -0.10 | -0.22 |
| Barmouth    | 63001  | Ystwyth        | Pont Llolwyn     | 19.27 | 0.52 | 0.21  | 0.01  | -0.07 |
| Barmouth    | 65001  | Glaslyn        | Beddgelert       | 19.30 | 0.52 | 0.30  | -0.01 | -0.12 |
| Bournemouth | 43021  | Avon           | Knapp Mill       | 17.21 | 2.32 | 0.10  | 0.18  | 0.14  |
| Bournemouth | 43003  | Avon           | East Mills Total | 17.19 | 1.75 | 0.09  | 0.19  | -0.02 |
| Bournemouth | 43007  | Stour          | Throop           | 17.25 | 5.22 | 0.13  | 0.15  | -0.07 |
| Cromer      | 33035  | Ely Ouse       | Denver Complex   | 24.65 | 0.41 | 0.05  | -0.04 | 0.05  |
| Cromer      | 33026  | Bedford Ouse   | Offord           | 25.92 | 0.39 | 0.05  | -0.07 | -0.03 |



|           |       |              |                  |       |      |      |       |       |
|-----------|-------|--------------|------------------|-------|------|------|-------|-------|
| Cromer    | 33039 | Bedford Ouse | Roxton           | 26.50 | 0.38 | 0.05 | -0.03 | 0.19  |
| Cromer    | 33002 | Bedford Ouse | Bedford          | 25.70 | 0.39 | 0.06 | -0.08 | 0.07  |
| Devonport | 47001 | Tamar        | Gunnislake       | 24.06 | 3.74 | 0.15 | 0.14  | 0.02  |
| Devonport | 46003 | Dart         | Austins Bridge   | 24.06 | 2.08 | 0.18 | 0.06  | -0.02 |
| Devonport | 47019 | Tamar        | Polson Bridge    | 23.81 | 3.36 | 0.16 | 0.12  | -0.18 |
| Devonport | 46002 | Teign        | Preston          | 15.48 | 4.52 | 0.15 | 0.00  | 0.06  |
| Devonport | 47015 | Tavy         | Ludbrook         | 24.05 | 2.91 | 0.18 | 0.07  | -0.11 |
| Devonport | 47006 | Lyd          | Lifton Park      | 23.81 | 4.20 | 0.16 | 0.17  | 0.00  |
| Fishguard | 62001 | Teifi        | Glanteifi        | 47.69 | 4.19 | 0.15 | 0.11  | -0.04 |
| Heysham   | 72004 | Lune         | Caton            | 40.94 | 0.49 | 0.27 | 0.04  | 0.06  |
| Heysham   | 71001 | Ribble       | Samlesbury       | 42.72 | 0.70 | 0.25 | 0.06  | -0.04 |
| Heysham   | 71009 | Ribble       | New Jumbles Rock | 31.56 | 0.00 | 0.26 | -0.05 | -0.04 |
| Heysham   | 73010 | Leven        | Newby Bridge     | 42.73 | 2.34 | 0.19 | 0.13  | 0.05  |
| Heysham   | 71006 | Ribble       | Henthorn         | 37.95 | 0.79 | 0.24 | 0.04  | -0.05 |
| Heysham   | 72005 | Lune         | Killington       | 37.03 | 0.54 | 0.27 | 0.05  | 0.11  |
| Heysham   | 73005 | Kent         | Sedgwick         | 38.02 | 0.79 | 0.25 | 0.08  | 0.07  |
| Heysham   | 72011 | Rawthey      | Brigflatts       | 35.08 | 0.29 | 0.28 | -0.03 | 0.08  |

|            |       |         |                |       |      |      |       |       |
|------------|-------|---------|----------------|-------|------|------|-------|-------|
| Heysham    | 71008 | Hodder  | Hodder Place   | 34.42 | 0.00 | 0.25 | -0.05 | -0.07 |
| Heysham    | 71004 | Calder  | Whalley Weir   | 41.72 | 0.48 | 0.23 | 0.04  | -0.05 |
| Heysham    | 71011 | Ribble  | Arnford        | 39.07 | 0.51 | 0.26 | 0.03  | -0.02 |
| Heysham    | 72002 | Wyre    | St Michaels    | 42.73 | 0.47 | 0.22 | 0.02  | -0.11 |
| Heysham    | 72015 | Lune    | Lunes Bridge   | 30.62 | 0.65 | 0.27 | 0.05  | -0.03 |
| Heysham    | 74001 | Duddon  | Duddon Hall    | 38.67 | 0.26 | 0.28 | -0.10 | 0.13  |
| Hinkley    | 45001 | Exe     | Thorverton     | 23.53 | 3.40 | 0.13 | 0.08  | -0.08 |
| Hinkley    | 45002 | Exe     | Stoodleigh     | 23.53 | 2.55 | 0.13 | 0.07  | -0.15 |
| Hinkley    | 45011 | Barle   | Brushford      | 22.45 | 0.45 | 0.13 | 0.13  | -0.12 |
| Holyhead   | 65006 | Seiont  | Peblig Mill    | 29.67 | 3.03 | 0.25 | 0.09  | 0.06  |
| Ilfracombe | 50001 | Taw     | Umberleigh     | 30.50 | 2.29 | 0.15 | 0.05  | -0.04 |
| Ilfracombe | 50002 | Torrige | Torrington     | 30.50 | 2.29 | 0.17 | 0.01  | -0.02 |
| Ilfracombe | 50006 | Mole    | Woodleigh      | 30.50 | 1.31 | 0.14 | 0.04  | 0.08  |
| Ilfracombe | 50010 | Torrige | Rockhay Bridge | 22.45 | 1.78 | 0.17 | 0.04  | -0.18 |
| Immingham  | 28022 | Trent   | North Muskham  | 43.50 | 0.69 | 0.11 | -0.01 | -0.05 |
| Immingham  | 28009 | Trent   | Colwick        | 49.08 | 1.02 | 0.11 | -0.06 | -0.08 |
| Immingham  | 28007 | Trent   | Shardlow       | 26.09 | 0.38 | 0.12 | 0.00  | -0.18 |
| Immingham  | 27009 | Ouse    | Skelton        | 41.85 | 0.96 | 0.13 | 0.01  | 0.15  |

|           |       |         |                  |       |      |      |       |       |
|-----------|-------|---------|------------------|-------|------|------|-------|-------|
| Immingham | 28019 | Trent   | Drakelow Park    | 45.65 | 0.66 | 0.12 | -0.05 | -0.07 |
| Immingham | 27003 | Aire    | Beal Weir        | 48.90 | 0.61 | 0.13 | -0.04 | 0.18  |
| Immingham | 27007 | Ure     | Westwick Lock    | 49.02 | 1.22 | 0.13 | -0.05 | 0.00  |
| Immingham | 27071 | Swale   | Crakehill        | 51.59 | 1.36 | 0.12 | -0.03 | 0.02  |
| Immingham | 27079 | Calder  | Methley          | 23.29 | 0.43 | 0.14 | -0.03 | 0.03  |
| Immingham | 28067 | Derwent | Church Wilne     | 39.08 | 0.77 | 0.10 | -0.01 | 0.06  |
| Immingham | 27080 | Aire    | Lemonroyd        | 27.10 | 0.00 | 0.14 | -0.08 | 0.01  |
| Immingham | 27002 | Wharfe  | Flint Mill Weir  | 51.55 | 0.58 | 0.13 | -0.04 | 0.01  |
| Immingham | 27089 | Wharfe  | Tadcaster        | 20.50 | 0.49 | 0.15 | 0.01  | 0.05  |
| Immingham | 28085 | Derwent | St Mary's Bridge | 51.79 | 0.77 | 0.10 | -0.04 | -0.04 |
| Immingham | 27041 | Derwent | Buttercrambe     | 38.74 | 0.77 | 0.07 | -0.02 | -0.01 |
| Immingham | 27034 | Derwent | Stamford Bridge  | 44.47 | 0.67 | 0.12 | -0.07 | -0.05 |
| Immingham | 27021 | Don     | Doncaster        | 47.15 | 0.42 | 0.11 | -0.05 | 0.13  |
| Immingham | 27028 | Aire    | Armley           | 48.65 | 0.62 | 0.13 | -0.06 | -0.02 |
| Immingham | 28117 | Derwent | Whatstandwell    | 16.07 | 0.00 | 0.12 | -0.06 | 0.25  |
| Immingham | 27043 | Wharfe  | Addingham        | 38.16 | 0.52 | 0.12 | -0.05 | -0.06 |



|           |       |         |                      |       |      |      |       |       |
|-----------|-------|---------|----------------------|-------|------|------|-------|-------|
| Immingham | 28080 | Tame    | Lea Marston<br>Lakes | 50.03 | 1.00 | 0.11 | -0.09 | 0.01  |
| Immingham | 28018 | Dove    | Marston on<br>Dove   | 48.84 | 1.02 | 0.10 | -0.01 | 0.07  |
| Immingham | 27090 | Swale   | Catterick<br>Bridge  | 19.95 | 0.50 | 0.13 | -0.08 | 0.14  |
| Immingham | 28011 | Derwent | Matlock Bath         | 39.91 | 1.00 | 0.09 | -0.02 | 0.06  |
| Immingham | 28012 | Trent   | Yoxall               | 46.07 | 1.09 | 0.10 | -0.04 | 0.00  |
| Immingham | 28074 | Soar    | Kegworth             | 26.89 | 1.12 | 0.12 | -0.06 | -0.06 |
| Immingham | 28093 | Soar    | Pillings Lock        | 25.94 | 1.16 | 0.11 | -0.02 | 0.05  |
| Immingham | 27062 | Nidd    | Skip Bridge          | 31.19 | 1.28 | 0.11 | 0.06  | 0.08  |
| Immingham | 27029 | Calder  | Elland               | 46.20 | 0.43 | 0.12 | -0.06 | 0.01  |
| Immingham | 27001 | Nidd    | Hunsingore<br>Weir   | 51.02 | 0.78 | 0.11 | -0.06 | -0.03 |
| Immingham | 28008 | Dove    | Rocester Weir        | 51.78 | 0.77 | 0.10 | -0.04 | -0.05 |
| Immingham | 27035 | Aire    | Kildwick<br>Bridge   | 43.32 | 0.46 | 0.12 | -0.05 | 0.07  |
| Immingham | 28043 | Derwent | Chatsworth           | 43.42 | 0.92 | 0.10 | 0.00  | 0.03  |
| Immingham | 28014 | Sow     | Milford              | 29.83 | 1.01 | 0.10 | -0.05 | 0.10  |

|               |       |            |                  |       |      |      |       |       |
|---------------|-------|------------|------------------|-------|------|------|-------|-------|
| Immingham     | 28003 | Tame       | Water Orton      | 40.49 | 0.74 | 0.09 | -0.14 | 0.06  |
| Immingham     | 27006 | Don        | Hadfields Weir   | 46.39 | 0.43 | 0.11 | -0.03 | 0.01  |
| Immingham     | 27053 | Nidd       | Birstwith        | 37.40 | 0.53 | 0.11 | 0.00  | 0.03  |
| Kinlochbervie | 96002 | Naver      | Apigill          | 21.73 | 3.68 | 0.13 | 0.22  | -0.14 |
| Kinlochbervie | 96004 | Strathmore | Allnabad         | 21.73 | 1.38 | 0.22 | -0.04 | -0.17 |
| Leith         | 15006 | Tay        | Ballathie        | 25.35 | 1.58 | 0.16 | 0.04  | -0.01 |
| Leith         | 15003 | Tay        | Caputh           | 25.35 | 1.97 | 0.16 | 0.08  | 0.00  |
| Leith         | 21009 | Tweed      | Norham           | 25.35 | 1.18 | 0.16 | 0.07  | 0.16  |
| Leith         | 15012 | Tummel     | Pitlochry        | 25.35 | 1.97 | 0.14 | 0.11  | -0.08 |
| Leith         | 21021 | Tweed      | Sprouston        | 23.54 | 1.27 | 0.18 | 0.12  | 0.13  |
| Leith         | 15007 | Tay        | Pitnacree        | 25.35 | 1.97 | 0.16 | 0.10  | -0.10 |
| Leith         | 15016 | Tay        | Kenmore          | 25.35 | 1.58 | 0.15 | 0.14  | 0.08  |
| Leith         | 18011 | Forth      | Craigforth       | 24.36 | 3.28 | 0.22 | 0.09  | 0.07  |
| Leith         | 21006 | Tweed      | Boleside         | 25.32 | 1.58 | 0.18 | 0.05  | 0.09  |
| Leith         | 16004 | Earn       | Forteviot Bridge | 25.35 | 1.97 | 0.17 | -0.02 | -0.02 |
| Leith         | 18003 | Teith      | Bridge of Teith  | 24.43 | 2.87 | 0.22 | 0.08  | -0.01 |
| Leith         | 16001 | Earn       | Kinkell Bridge   | 25.35 | 1.97 | 0.17 | -0.03 | -0.08 |

|       |       |               |                |       |      |      |       |       |
|-------|-------|---------------|----------------|-------|------|------|-------|-------|
| Leith | 21008 | Teviot        | Ormiston Mill  | 25.29 | 1.58 | 0.17 | 0.07  | 0.07  |
| Leith | 15034 | Garry         | Killiecrankie  | 23.12 | 1.73 | 0.16 | 0.05  | 0.09  |
| Leith | 21003 | Tweed         | Peebles        | 23.34 | 1.71 | 0.16 | 0.10  | -0.03 |
| Leith | 15024 | Dochart       | Killin         | 24.79 | 2.42 | 0.23 | 0.07  | -0.06 |
| Leith | 18010 | Forth         | Gargunnoch     | 21.53 | 2.32 | 0.22 | 0.20  | 0.07  |
| Leith | 21007 | Ettrick Water | Lindean        | 22.53 | 1.33 | 0.21 | 0.13  | 0.03  |
| Leith | 15025 | Ericht        | Craighall      | 24.79 | 0.81 | 0.16 | 0.00  | -0.03 |
| Leith | 18008 | Leny          | Anie           | 24.34 | 2.47 | 0.23 | 0.06  | -0.02 |
| Leith | 15011 | Lyon          | Comrie Bridge  | 25.35 | 1.97 | 0.19 | 0.07  | 0.02  |
| Leith | 21005 | Tweed         | Lyne Ford      | 23.54 | 0.42 | 0.17 | 0.09  | 0.02  |
| Leith | 21012 | Teviot        | Hawick         | 24.34 | 0.82 | 0.19 | 0.04  | 0.01  |
| Leith | 15010 | Isla          | Wester Cardean | 24.34 | 0.82 | 0.15 | -0.07 | -0.30 |
| Leith | 18015 | Eas Gobhain   | Loch Venachar  | 24.43 | 3.68 | 0.13 | 0.08  | -0.06 |
| Leith | 15039 | Tilt          | Marble Lodge   | 22.35 | 0.89 | 0.15 | 0.02  | 0.05  |
| Leith | 15023 | Braan         | Hermitage      | 24.79 | 1.21 | 0.17 | -0.05 | -0.08 |



|           |       |                  |                           |       |      |      |       |       |
|-----------|-------|------------------|---------------------------|-------|------|------|-------|-------|
| Leith     | 18005 | Allan Water      | Bridge of Allan           | 22.41 | 0.89 | 0.19 | 0.08  | 0.00  |
| Leith     | 15041 | Lyon             | Camusvrachan              | 15.68 | 1.28 | 0.20 | 0.04  | 0.22  |
| Leith     | 21022 | Whiteadder Water | Hutton Castle             | 25.35 | 0.79 | 0.10 | 0.04  | 0.26  |
| Leith     | 21011 | Yarrow Water     | Philiphaugh               | 23.32 | 1.72 | 0.18 | 0.07  | 0.00  |
| Leith     | 19001 | Almond           | Craigiehall               | 23.42 | 1.71 | 0.19 | 0.14  | 0.04  |
| Leith     | 15013 | Almond           | Almondbank                | 25.35 | 1.18 | 0.17 | -0.02 | -0.07 |
| Leith     | 18001 | Allan Water      | Kinbuck                   | 24.43 | 0.82 | 0.19 | 0.04  | 0.07  |
| Leith     | 16003 | Ruchill Water    | Cultybraggan              | 25.35 | 1.58 | 0.20 | -0.01 | -0.19 |
| Leith     | 21020 | Yarrow Water     | Gordon Arms               | 20.53 | 1.46 | 0.19 | 0.11  | 0.12  |
| Liverpool | 67027 | Dee              | Ironbridge                | 18.54 | 2.16 | 0.17 | 0.03  | -0.13 |
| Liverpool | 67033 | Dee              | Chester Suspension Bridge | 17.15 | 1.17 | 0.17 | 0.09  | -0.19 |
| Liverpool | 67015 | Dee              | Manley Hall               | 22.08 | 3.62 | 0.21 | 0.10  | -0.23 |
| Liverpool | 69002 | Irwell           | Adelphi Weir              | 22.06 | 0.45 | 0.26 | 0.04  | -0.08 |

|               |       |                 |                  |       |      |      |       |       |
|---------------|-------|-----------------|------------------|-------|------|------|-------|-------|
| Liverpool     | 67001 | Dee             | Bala             | 21.95 | 3.19 | 0.25 | 0.09  | -0.06 |
| Liverpool     | 69007 | Mersey          | Ashton Weir      | 22.08 | 0.45 | 0.20 | -0.02 | -0.14 |
| Liverpool     | 68001 | Weaver          | Ashbrook         | 22.08 | 1.81 | 0.15 | -0.03 | -0.14 |
| Liverpool     | 67006 | Alwen           | Druid            | 22.08 | 1.36 | 0.20 | 0.10  | -0.05 |
| Liverpool     | 68003 | Dane            | Rudheath         | 22.08 | 1.36 | 0.17 | -0.07 | -0.12 |
| Llandudno     | 66011 | Conwy           | Cwmlanerch       | 20.51 | 1.95 | 0.27 | -0.07 | 0.09  |
| Llandudno     | 66025 | Clwyd           | Pont Dafydd      | 19.72 | 2.03 | 0.11 | -0.11 | -0.11 |
| Llandudno     | 66001 | Clwyd           | Pont-y-Cambwll   | 20.51 | 2.93 | 0.11 | -0.11 | -0.35 |
| Llandudno     | 66012 | Lledr           | Pont Gethin      | 19.25 | 1.04 | 0.29 | -0.20 | 0.12  |
| Milford Haven | 60003 | Taf             | Clog-y-Fran      | 38.20 | 3.14 | 0.16 | 0.07  | -0.02 |
| Milford Haven | 61002 | Eastern Cleddau | Canaston Bridge  | 39.67 | 1.01 | 0.17 | 0.04  | -0.07 |
| Milford Haven | 61001 | Western Cleddau | Prendergast Mill | 37.33 | 2.14 | 0.16 | 0.01  | -0.03 |
| Millport      | 84013 | Clyde           | Daldowie         | 33.19 | 3.31 | 0.25 | 0.29  | -0.02 |
| Millport      | 85001 | Leven           | Linnbrane        | 33.08 | 3.63 | 0.13 | 0.16  | -0.04 |
| Millport      | 84005 | Clyde           | Blairston        | 32.72 | 3.36 | 0.24 | 0.25  | 0.09  |
| Millport      | 84003 | Clyde           | Hazelbank        | 33.22 | 2.71 | 0.22 | 0.28  | -0.14 |

|          |       |                  |                |       |      |      |      |       |
|----------|-------|------------------|----------------|-------|------|------|------|-------|
| Millport | 84018 | Clyde            | Tulliford Mill | 33.22 | 2.71 | 0.22 | 0.26 | -0.02 |
| Millport | 89003 | Orchy            | Glen Orchy     | 32.74 | 1.22 | 0.31 | 0.04 | 0.01  |
| Millport | 84004 | Clyde            | Sills of Clyde | 33.22 | 3.01 | 0.22 | 0.26 | -0.05 |
| Millport | 83006 | Ayr              | Mainholm       | 33.22 | 2.11 | 0.25 | 0.18 | 0.00  |
| Millport | 86002 | Eachaig          | Eckford        | 15.31 | 1.96 | 0.30 | 0.09 | -0.10 |
| Millport | 83005 | Irvine           | Shewalton      | 26.65 | 0.00 | 0.27 | 0.07 | 0.05  |
| Millport | 84001 | Kelvin           | Killermont     | 33.17 | 1.21 | 0.28 | 0.17 | -0.04 |
| Millport | 84014 | Avon Water       | Fairholm       | 33.10 | 1.51 | 0.27 | 0.20 | 0.01  |
| Millport | 85002 | Endrick Water    | Gaidrew        | 33.04 | 3.33 | 0.29 | 0.11 | 0.02  |
| Millport | 82002 | Doon             | Auchendrane    | 33.20 | 3.31 | 0.25 | 0.12 | 0.03  |
| Millport | 84015 | Kelvin           | Dryfield       | 17.39 | 1.15 | 0.29 | 0.14 | 0.08  |
| Millport | 82001 | Girvan           | Robstone       | 33.10 | 2.12 | 0.24 | 0.04 | 0.03  |
| Millport | 84012 | White Cart Water | Hawkhead       | 33.22 | 2.11 | 0.27 | 0.11 | 0.00  |
| Millport | 83009 | Garnock          | Kilwinning     | 33.20 | 1.20 | 0.29 | 0.03 | 0.00  |
| Millport | 83013 | Irvine           | Glenfield      | 30.83 | 0.97 | 0.26 | 0.13 | -0.02 |
| Millport | 85003 | Falloch          | Glen Falloch   | 33.08 | 0.30 | 0.33 | 0.01 | -0.10 |

|          |       |             |                |       |      |      |       |       |
|----------|-------|-------------|----------------|-------|------|------|-------|-------|
| Millport | 83004 | Lugar Water | Langholm       | 33.16 | 3.02 | 0.26 | 0.12  | -0.04 |
| Millport | 83003 | Ayr         | Catrine        | 32.87 | 2.74 | 0.26 | 0.17  | -0.10 |
| Mumbles  | 60010 | Tywi        | Capel Dewi     | 17.80 | 4.49 | 0.20 | 0.18  | -0.09 |
| Mumbles  | 59001 | Tawe        | Ynystanglws    | 17.85 | 2.80 | 0.25 | 0.03  | -0.06 |
| Mumbles  | 60002 | Cothi       | Felin Mynachdy | 17.85 | 3.36 | 0.21 | 0.14  | -0.01 |
| Mumbles  | 60007 | Tywi        | Dolau Hirion   | 17.85 | 2.80 | 0.21 | 0.17  | -0.02 |
| Mumbles  | 58002 | Neath       | Resolven       | 17.85 | 2.80 | 0.25 | 0.04  | 0.03  |
| Mumbles  | 58001 | Ogmore      | Bridgend       | 17.85 | 1.12 | 0.20 | -0.03 | -0.14 |
| Mumbles  | 58012 | Afan        | Marcroft Weir  | 17.82 | 1.68 | 0.22 | -0.07 | -0.06 |
| Mumbles  | 60006 | Gwili       | Glangwili      | 17.85 | 2.80 | 0.19 | 0.08  | -0.03 |
| Newlyn   | 49001 | Camel       | Denby          | 46.16 | 2.82 | 0.11 | 0.11  | -0.03 |
| Newport  | 56001 | Usk         | Chainbridge    | 18.47 | 2.71 | 0.13 | 0.20  | -0.08 |
| Newport  | 23003 | North Tyne  | Reaverhill     | 18.47 | 1.62 | 0.15 | 0.22  | 0.06  |
| Newport  | 57005 | Taff        | Pontypridd     | 17.99 | 2.22 | 0.13 | 0.28  | -0.07 |
| Newport  | 56002 | Ebbw        | Rhiwderin      | 18.47 | 1.62 | 0.13 | 0.21  | -0.01 |
| Newport  | 57007 | Taff        | Fiddlers Elbow | 18.47 | 1.62 | 0.16 | 0.19  | 0.10  |
| Newport  | 57006 | Rhondda     | Trehafod       | 18.47 | 2.17 | 0.14 | 0.24  | -0.19 |
| Newport  | 57008 | Rhymney     | Llanedeyrn     | 43.34 | 0.46 | 0.16 | 0.06  | 0.04  |



|               |       |            |                   |       |      |      |       |       |
|---------------|-------|------------|-------------------|-------|------|------|-------|-------|
| North Shields | 23001 | Tyne       | Bywell            | 43.31 | 0.92 | 0.14 | 0.03  | -0.06 |
| North Shields | 23004 | South Tyne | Haydon Bridge     | 42.90 | 0.23 | 0.17 | -0.01 | 0.05  |
| North Shields | 24009 | Wear       | Chester le Street | 33.75 | 0.00 | 0.12 | 0.07  | 0.05  |
| North Shields | 24001 | Wear       | Sunderland Bridge | 43.19 | 0.00 | 0.12 | 0.02  | -0.05 |
| North Shields | 23006 | South Tyne | Featherstone      | 40.30 | 0.25 | 0.18 | -0.01 | -0.03 |
| North Shields | 22001 | Coquet     | Morwick           | 42.33 | 0.24 | 0.09 | 0.08  | 0.04  |
| North Shields | 23022 | North Tyne | Ugldub            | 31.05 | 2.58 | 0.04 | 0.10  | -0.03 |
| North Shields | 23005 | North Tyne | Tarset            | 15.53 | 0.00 | 0.12 | -0.16 | 0.21  |
| North Shields | 24008 | Wear       | Witton Park       | 35.34 | 0.28 | 0.13 | 0.03  | -0.06 |
| North Shields | 23008 | Rede       | Rede Bridge       | 38.52 | 0.52 | 0.13 | 0.08  | 0.05  |
| North Shields | 22009 | Coquet     | Rothbury          | 36.01 | 0.56 | 0.10 | 0.06  | 0.02  |
| Portpatrick   | 81002 | Cree       | Newton Stewart    | 42.27 | 1.42 | 0.28 | 0.09  | 0.04  |
| Portpatrick   | 81004 | Bladnoch   | Low Malzie        | 37.66 | 1.33 | 0.25 | 0.09  | -0.08 |

|             |        |                  |                      |       |      |      |      |       |
|-------------|--------|------------------|----------------------|-------|------|------|------|-------|
| Portpatrick | 81006  | Water of Minnoch | Minnoch Bridge       | 33.07 | 1.81 | 0.25 | 0.11 | 0.07  |
| Portpatrick | 81003  | Luce             | Airyhemming          | 25.49 | 1.96 | 0.31 | 0.05 | -0.11 |
| Portrush    | 203040 | Lower Bann       | Movanagher           | 42.27 | 0.71 | 0.25 | 0.06 | -0.04 |
| Portrush    | 201010 | Mourne           | Drumnabuoy House     | 20.22 | 1.48 | 0.09 | 0.04 | -0.02 |
| Portrush    | 203093 | Main             | Shane's Viaduct      | 20.22 | 1.98 | 0.25 | 0.12 | 0.03  |
| Portrush    | 203010 | Blackwater       | Maydown Bridge       | 19.82 | 1.01 | 0.18 | 0.09 | 0.12  |
| Portrush    | 201009 | Owenkillew       | Crosh                | 20.22 | 1.48 | 0.18 | 0.11 | -0.17 |
| Portrush    | 201008 | Derg             | Castleberg           | 20.22 | 0.49 | 0.24 | 0.13 | -0.09 |
| Portrush    | 82003  | Stinchar         | Balnowlart           | 20.22 | 1.48 | 0.27 | 0.07 | 0.15  |
| Portrush    | 203012 | Ballinderry      | Ballinderry Bridge   | 20.22 | 1.48 | 0.20 | 0.14 | 0.10  |
| Portrush    | 203020 | Moyola           | Moyola New Bridge    | 20.22 | 1.98 | 0.23 | 0.15 | -0.05 |
| Portrush    | 201006 | Drumragh         | Campsie Bridge       | 20.22 | 0.99 | 0.23 | 0.14 | -0.18 |
| Portrush    | 236005 | Colebrooke       | Ballindarragh Bridge | 20.22 | 0.99 | 0.23 | 0.09 | 0.03  |
| Portrush    | 202002 | Faughan          | Drumahoe             | 20.22 | 1.48 | 0.21 | 0.12 | 0.07  |

|            |        |            |                             |       |      |      |       |       |
|------------|--------|------------|-----------------------------|-------|------|------|-------|-------|
| Portrush   | 204001 | Bush       | Seneirl Bridge              | 20.22 | 0.99 | 0.15 | 0.09  | -0.05 |
| Portrush   | 201005 | Camowen    | Camowen Terrace             | 20.20 | 0.99 | 0.21 | 0.19  | -0.19 |
| Portrush   | 203011 | Main       | Dromona                     | 17.64 | 1.70 | 0.18 | 0.11  | 0.02  |
| Portrush   | 203092 | Main       | Dunminning                  | 20.14 | 1.49 | 0.17 | 0.10  | 0.01  |
| Portrush   | 236007 | Sillees    | Drumrainey Bridge           | 20.08 | 2.49 | 0.15 | 0.13  | 0.03  |
| Portrush   | 201002 | Fairywater | Dudgeon Bridge              | 20.22 | 2.47 | 0.26 | 0.18  | 0.09  |
| Portrush   | 203027 | Braid      | Ballee                      | 20.22 | 0.49 | 0.17 | 0.09  | -0.08 |
| Portsmouth | 42004  | Test       | Broadlands                  | 23.78 | 2.52 | 0.09 | 0.07  | 0.11  |
| Portsmouth | 42023  | Itchen     | Riverside Park              | 21.59 | 1.85 | 0.12 | 0.12  | 0.29  |
| Portsmouth | 42024  | Test       | Chilbolton Total            | 23.44 | 1.28 | 0.07 | 0.03  | 0.30  |
| Portsmouth | 42010  | Itchen     | Highbridge & Allbrook Total | 23.78 | 2.10 | 0.08 | 0.06  | 0.25  |
| Sheerness  | 39001  | Thames     | Kingston                    | 38.52 | 0.52 | 0.10 | -0.01 | 0.01  |
| Sheerness  | 39072  | Thames     | Royal Windsor Park          | 27.07 | 0.37 | 0.11 | 0.02  | 0.18  |

|           |       |        |                           |       |      |      |       |       |
|-----------|-------|--------|---------------------------|-------|------|------|-------|-------|
| Sheerness | 39121 | Thames | Walton                    | 15.75 | 0.00 | 0.12 | 0.03  | 0.16  |
| Sheerness | 39111 | Thames | Staines                   | 16.72 | 0.00 | 0.11 | -0.03 | 0.44  |
| Sheerness | 39130 | Thames | Reading                   | 15.52 | 0.00 | 0.13 | 0.00  | 0.27  |
| Sheerness | 39002 | Thames | Days Weir                 | 38.52 | 0.52 | 0.11 | -0.04 | 0.11  |
| Sheerness | 39046 | Thames | Sutton<br>Courtenay       | 24.43 | 0.82 | 0.12 | -0.15 | 0.31  |
| Sheerness | 39129 | Thames | Farmoor                   | 15.38 | 0.00 | 0.12 | 0.04  | -0.12 |
| Sheerness | 39008 | Thames | Eynsham                   | 38.52 | 0.78 | 0.10 | -0.05 | 0.09  |
| Sheerness | 40003 | Medway | Teston / East<br>Farleigh | 36.99 | 0.54 | 0.12 | -0.05 | 0.05  |
| Sheerness | 39016 | Kennet | Theale                    | 36.55 | 0.55 | 0.08 | -0.03 | 0.05  |
| Sheerness | 39079 | Wey    | Weybridge                 | 25.00 | 1.20 | 0.13 | -0.05 | 0.13  |
| Sheerness | 39104 | Mole   | Esher                     | 18.36 | 1.63 | 0.15 | -0.22 | 0.08  |
| Sheerness | 39103 | Kennet | Newbury                   | 18.39 | 0.00 | 0.07 | -0.05 | 0.00  |
| Tobermory | 91002 | Lochy  | Camisky                   | 23.06 | 1.73 | 0.21 | 0.09  | 0.06  |
| Tobermory | 92001 | Shiel  | Shielfoot                 | 17.77 | 1.69 | 0.15 | 0.01  | -0.06 |
| Tobermory | 90003 | Nevis  | Claggan                   | 23.06 | 0.43 | 0.30 | 0.06  | 0.09  |
| Ullapool  | 94001 | Ewe    | Poolewe                   | 36.17 | 3.04 | 0.11 | 0.13  | 0.05  |
| Ullapool  | 93001 | Carron | New Kelso                 | 31.14 | 0.64 | 0.27 | 0.02  | 0.10  |
| Ullapool  | 95001 | Inver  | Little Assynt             | 31.98 | 1.25 | 0.10 | 0.16  | 0.07  |
| Ullapool  | 95002 | Broom  | Inverbroom                | 29.44 | 1.02 | 0.24 | 0.17  | 0.12  |



|          |       |          |                          |       |      |      |       |       |
|----------|-------|----------|--------------------------|-------|------|------|-------|-------|
| Weymouth | 44001 | Frome    | East Stoke<br>Total      | 23.30 | 3.43 | 0.11 | 0.21  | 0.20  |
| Weymouth | 43009 | Stour    | Hammoon                  | 23.30 | 6.01 | 0.16 | 0.22  | -0.05 |
| Weymouth | 45004 | Axe      | Whitford                 | 23.30 | 2.58 | 0.21 | 0.25  | -0.18 |
| Whitby   | 25009 | Tees     | Low Moor                 | 31.55 | 0.32 | 0.15 | -0.12 | -0.10 |
| Whitby   | 25001 | Tees     | Broken Scar              | 31.54 | 1.27 | 0.14 | -0.13 | -0.10 |
| Whitby   | 25008 | Tees     | Barnard Castle           | 25.42 | 0.79 | 0.14 | -0.02 | -0.13 |
| Whitby   | 25018 | Tees     | Middleton in<br>Teesdale | 31.31 | 1.28 | 0.14 | -0.14 | -0.13 |
| Whitby   | 27092 | Esk      | Briggswath               | 20.45 | 0.00 | 0.07 | -0.19 | -0.07 |
| Wick     | 6007  | Ness     | Ness-side                | 41.00 | 3.90 | 0.14 | -0.03 | 0.03  |
| Wick     | 8006  | Spey     | Boat o Brig              | 46.65 | 2.79 | 0.11 | -0.05 | -0.04 |
| Wick     | 4001  | Conon    | Moy Bridge               | 42.48 | 2.82 | 0.11 | 0.02  | 0.07  |
| Wick     | 8010  | Spey     | Grantown                 | 46.65 | 4.07 | 0.14 | -0.05 | 0.11  |
| Wick     | 5003  | Glass    | Kerrow Wood              | 25.73 | 2.72 | 0.15 | 0.10  | 0.04  |
| Wick     | 8005  | Spey     | Boat of Garten           | 46.65 | 3.86 | 0.15 | -0.04 | 0.09  |
| Wick     | 8002  | Spey     | Kinrara                  | 46.65 | 4.07 | 0.16 | -0.05 | 0.08  |
| Wick     | 7002  | Findhorn | Forres                   | 46.65 | 1.72 | 0.13 | -0.05 | -0.18 |
| Wick     | 5002  | Farrar   | Struy                    | 23.39 | 1.28 | 0.07 | 0.07  | 0.12  |

|            |       |            |                |       |      |      |       |       |
|------------|-------|------------|----------------|-------|------|------|-------|-------|
| Wick       | 3003  | Oykel      | Easter Turnaig | 35.94 | 0.83 | 0.22 | 0.02  | 0.11  |
| Wick       | 8004  | Avon       | Delnashaugh    | 46.65 | 0.43 | 0.08 | -0.09 | 0.00  |
| Wick       | 7001  | Findhorn   | Shenachie      | 46.65 | 2.36 | 0.14 | -0.05 | 0.04  |
| Wick       | 2001  | Helmsdale  | Kilphedir      | 38.68 | 1.29 | 0.10 | 0.00  | -0.08 |
| Wick       | 2002  | Brora      | Bruachrobie    | 21.18 | 0.94 | 0.16 | 0.11  | 0.01  |
| Wick       | 3002  | Carron     | Sgodachail     | 39.68 | 2.27 | 0.18 | 0.01  | 0.02  |
| Wick       | 97002 | Thurso     | Halkirk        | 41.68 | 1.20 | 0.07 | 0.02  | -0.16 |
| Wick       | 8013  | Feshie     | Feshie Bridge  | 20.68 | 0.48 | 0.17 | -0.02 | 0.02  |
| Wick       | 3004  | Cassley    | Rosehall       | 33.99 | 1.18 | 0.23 | 0.07  | 0.05  |
| Wick       | 4005  | Meig       | Glenmeanie     | 24.66 | 2.03 | 0.25 | 0.05  | 0.20  |
| Wick       | 4003  | Alness     | Alness         | 28.41 | 2.11 | 0.26 | 0.00  | 0.14  |
| Wick       | 8007  | Spey       | Invertruim     | 39.68 | 2.27 | 0.13 | -0.02 | -0.11 |
| Wick       | 8009  | Dalnain    | Balnaan Bridge | 42.32 | 4.96 | 0.17 | -0.04 | 0.06  |
| Wick       | 4004  | Blackwater | Contin         | 46.65 | 2.79 | 0.13 | -0.02 | -0.11 |
| Wick       | 6009  | Moriston   | Levishie       | 28.67 | 2.44 | 0.18 | 0.05  | -0.13 |
| Wick       | 7004  | Nairn      | Firhall        | 15.99 | 1.25 | 0.15 | 0.07  | 0.08  |
| Wick       | 5004  | Glass      | Fasnakyle      | 34.78 | 0.86 | 0.10 | -0.01 | -0.14 |
| Wick       | 96001 | Halladale  | Halladale      | 23.58 | 3.39 | 0.24 | 0.01  | 0.06  |
| Workington | 76007 | Eden       | Sheepmount     | 37.68 | 1.33 | 0.11 | 0.04  | -0.05 |

|            |       |              |                |       |      |      |       |       |
|------------|-------|--------------|----------------|-------|------|------|-------|-------|
| Workington | 80002 | Dee          | Glenlochar     | 22.91 | 5.24 | 0.22 | -0.05 | 0.11  |
| Workington | 78003 | Annan        | Brydekirk      | 22.66 | 3.97 | 0.23 | -0.10 | 0.08  |
| Workington | 79002 | Nith         | Friars Carse   | 23.65 | 2.96 | 0.27 | -0.09 | -0.06 |
| Workington | 75002 | Derwent      | Camerton       | 23.65 | 2.96 | 0.27 | 0.00  | -0.11 |
| Workington | 77002 | Esk          | Canonbie       | 16.89 | 5.33 | 0.20 | -0.11 | 0.20  |
| Workington | 79006 | Nith         | Drumlanrig     | 23.65 | 2.96 | 0.28 | -0.11 | 0.02  |
| Workington | 75003 | Derwent      | Ouse Bridge    | 22.66 | 2.21 | 0.28 | -0.03 | 0.03  |
| Workington | 76003 | Eamont       | Udford         | 23.65 | 4.23 | 0.17 | -0.01 | 0.03  |
| Workington | 76005 | Eden         | Temple Sowerby | 23.65 | 6.34 | 0.21 | -0.06 | 0.02  |
| Workington | 75005 | Derwent      | Portinscale    | 23.57 | 5.09 | 0.23 | -0.04 | -0.05 |
| Workington | 77003 | Liddel Water | Rowanburnfoot  | 23.59 | 4.24 | 0.24 | -0.08 | 0.04  |
| Workington | 78006 | Annan        | Woodfoot       | 23.65 | 2.54 | 0.28 | -0.13 | -0.06 |
| Workington | 79005 | Cluden Water | Fiddlers Ford  | 23.65 | 3.38 | 0.28 | -0.09 | 0.05  |
| Workington | 76015 | Eamont       | Pooley Bridge  | 23.65 | 2.96 | 0.26 | -0.08 | -0.05 |
| Workington | 78005 | Kinnel Water | Bridgemuir     | 23.64 | 5.50 | 0.18 | -0.02 | 0.09  |
| Workington | 76008 | Irthing      | Greenholme     | 23.65 | 2.54 | 0.28 | -0.08 | 0.00  |
| Workington | 4006  | Bran         | Dosmucheran    | 23.64 | 1.69 | 0.25 | -0.11 | 0.10  |

|            |       |            |                      |       |      |      |       |       |
|------------|-------|------------|----------------------|-------|------|------|-------|-------|
| Workington | 80001 | Urr        | Dalbeattie           | 23.65 | 2.54 | 0.26 | -0.10 | -0.03 |
| Workington | 79003 | Nith       | Hall Bridge          | 23.65 | 3.38 | 0.28 | -0.02 | -0.13 |
| Workington | 79004 | Scar Water | Capenoch             | 23.65 | 1.27 | 0.30 | -0.05 | 0.12  |
| Workington | 75004 | Cocker     | Southwaite<br>Bridge | 23.65 | 4.23 | 0.23 | -0.14 | 0.00  |
| Workington | 74005 | Ehen       | Braystones           | 23.52 | 0.85 | 0.25 | -0.19 | 0.00  |
